# Supplementary material for: Molecular evolutionary engineering of xylose isomerase to improve its catalytic activity and performance of micro-aerobic glucose/xylose co-fermentation in Saccharomyces cerevisiae
Source: PubMed Central journal article supplement (PMC6551904; doi:10.1186/s13068-019-1474-z), 2019-06-06

| Strain | LpXI              | n       | Concentrations of xylose |        |        |        |
|--------|-------------------|---------|--------------------------|--------|--------|--------|
|        |                   |         | 500 mM                   | 100 mM | 50 mM  | 10 mM  |
| SS81   | Wild-type         | 1       | 0.0133                   | 0.0079 | 0.0065 | 0.0024 |
|        |                   | 2       | 0.0134                   | 0.0080 | 0.0066 | 0.0024 |
|        |                   | 3       | 0.0132                   | 0.0071 | 0.0061 | 0.0022 |
|        |                   | mean    | 0.0133                   | 0.0077 | 0.0064 | 0.0023 |
|        |                   | sd      | 0.0001                   | 0.0005 | 0.0003 | 0.0001 |
| SS82   | T63I/A121A        | 1       | 0.0145                   | 0.0156 | 0.0110 | 0.0047 |
|        |                   | 2       | 0.0145                   | 0.0152 | 0.0109 | 0.0043 |
|        |                   | 3       | 0.0148                   | 0.0150 | 0.0103 | 0.0042 |
|        |                   | mean    | 0.0146                   | 0.0153 | 0.0107 | 0.0044 |
|        |                   | sd      | 0.0002                   | 0.0003 | 0.0004 | 0.0003 |
| SS92   | V162A/T273T/N303T | 1       | 0.0104                   | 0.0120 | 0.0074 | 0.0034 |
|        |                   | 2       | 0.0105                   | 0.0110 | 0.0080 | 0.0032 |
|        |                   | 3       | 0.0105                   | 0.0107 | 0.0078 | 0.0031 |
|        |                   | mean    | 0.0105                   | 0.0112 | 0.0077 | 0.0032 |
|        |                   | sd      | 0.0001                   | 0.0007 | 0.0003 | 0.0002 |
| SS104  | V162A             | 1       | 0.0098                   | 0.0113 | 0.0068 | 0.0031 |
|        |                   | 2       | 0.0100                   | 0.0104 | 0.0074 | 0.0029 |
|        |                   | 3       | 0.0103                   | 0.0103 | 0.0074 | 0.0030 |
|        |                   | mean    | 0.0100                   | 0.0107 | 0.0072 | 0.0030 |
|        |                   | sd      | 0.0003                   | 0.0006 | 0.0003 | 0.0001 |
| SS105  | N303T             | 1       | 0.0048                   | 0.0062 | 0.0040 | 0.0020 |
|        |                   | 2       | 0.0048                   | 0.0051 | 0.0039 | 0.0019 |
|        |                   | 3       | 0.0050                   | 0.0054 | 0.0039 | 0.0019 |
|        |                   | mean±SD | 0.0049                   | 0.0056 | 0.0039 | 0.0019 |
|        |                   | sd      | 0.0001                   | 0.0006 | 0.0001 | 0.0001 |
| SS120  | T63I/V162A        | 1       | 0.0161                   | 0.0165 | 0.0118 | 0.0041 |
|        |                   | 2       | 0.0161                   | 0.0162 | 0.0116 | 0.0043 |
|        |                   | 3       | 0.0166                   | 0.0158 | 0.0118 | 0.0043 |
|        |                   | mean±SD | 0.0163                   | 0.0162 | 0.0117 | 0.0042 |
|        |                   | sd      | 0.0003                   | 0.0004 | 0.0001 | 0.0001 |

| 1/n          |              |              |              |
|--------------|--------------|--------------|--------------|
| 500 mM       | 100 mM       | 50 mM        | 10 mM        |
| 75.18796992  | 126.58227848 | 153.84615385 | 416.66666667 |
| 74.62686567  | 125.00000000 | 151.51515152 | 416.66666667 |
| 75.75757576  | 140.84507042 | 163.93442623 | 454.54545455 |
| 75.18796992  | 130.43478261 | 156.25000000 | 428.57142857 |
| 0.56536037   | 8.72732391   | 6.60107562   | 21.86932838  |
| 68.96551724  | 64.10256410  | 90.90909091  | 212.76595745 |
| 68.96551724  | 65.78947368  | 91.74311927  | 232.55813953 |
| 67.56756757  | 66.66666667  | 97.08737864  | 238.09523810 |
| 68.49315068  | 65.50218341  | 93.16770186  | 227.27272727 |
| 0.80710662   | 1.30318542   | 3.35231141   | 13.31642088  |
| 96.15384615  | 83.33333333  | 135.13513514 | 294.11764706 |
| 95.23809524  | 90.90909091  | 125.00000000 | 312.50000000 |
| 95.23809524  | 93.45794393  | 128.20512821 | 322.58064516 |
| 95.54140127  | 89.02077151  | 129.31034483 | 309.27835052 |
| 0.52870904   | 5.26618923   | 5.18039263   | 14.43186617  |
| 102.04081633 | 88.49557522  | 147.05882353 | 322.58064516 |
| 100.00000000 | 96.15384615  | 135.13513514 | 344.82758621 |
| 97.08737864  | 97.08737864  | 135.13513514 | 333.33333333 |
| 99.66777409  | 93.75000000  | 138.88888889 | 333.33333333 |
| 2.48947248   | 4.71415745   | 6.88414470   | 11.12553023  |
| 208.33333333 | 161.29032258 | 250.00000000 | 500.00000000 |
| 208.33333333 | 196.07843137 | 256.41025641 | 526.31578947 |
| 200.00000000 | 185.18518519 | 256.41025641 | 526.31578947 |
| 205.47945205 | 179.64071856 | 254.23728814 | 517.24137931 |
| 4.81125224   | 17.79438013  | 3.70096326   | 15.19342814  |
| 62.11180124  | 60.60606061  | 84.74576271  | 243.90243902 |
| 62.11180124  | 61.72839506  | 86.20689655  | 232.55813953 |
| 60.24096386  | 63.29113924  | 84.74576271  | 232.55813953 |
| 61.47540984  | 61.85567010  | 85.22727273  | 236.22047244 |
| 1.08012847   | 1.34854559   | 0.84358602   | 6.54963436   |

| Km/Vmax     | 1/Vmax (340 nm) | Vmax (340 nm) | Vmax (umol/min/mg protein) | Km          |
|-------------|-----------------|---------------|----------------------------|-------------|
| 3362.792322 | 82.09862061     | 0.0122        | 0.0650                     | 41.0        |
| 3376.469886 | 80.52866471     | 0.0124        | 0.0662                     | 41.9        |
| 3698.028049 | 86.73570612     | 0.0115        | 0.0615                     | 42.6        |
| 3479.0968   | 83.1210         | 0.0120        | <b>0.064</b>               | <b>41.8</b> |
| 189.7234    | 3.2273          | 0.0005        | <b>0.002</b>               | <b>0.8</b>  |
| 1538.908744 | 58.40179387     | 0.0171        | 0.0913                     | 26.4        |
| 1746.526654 | 57.12868285     | 0.0175        | 0.0934                     | 30.6        |
| 1799.335898 | 57.9761281      | 0.0172        | 0.0920                     | 31.0        |
| 1694.9238   | 57.8355         | 0.0173        | <b>0.092</b>               | <b>29.3</b> |
| 137.6689    | 0.6481          | 0.0002        | <b>0.001</b>               | <b>2.6</b>  |
| 2122.916347 | 82.12875098     | 0.0122        | 0.0649                     | 25.8        |
| 2320.951522 | 79.32039631     | 0.0126        | 0.0672                     | 29.3        |
| 2414.496242 | 80.19207714     | 0.0125        | 0.0665                     | 30.1        |
| 2286.1214   | 80.5471         | 0.0124        | <b>0.066</b>               | <b>28.4</b> |
| 148.8777    | 1.4374          | 0.0002        | <b>0.001</b>               | <b>2.3</b>  |
| 2358.893133 | 87.20049166     | 0.0115        | 0.0612                     | 27.1        |
| 2608.190152 | 82.95886684     | 0.0121        | 0.0643                     | 31.4        |
| 2494.121361 | 83.35480151     | 0.0120        | 0.0640                     | 29.9        |
| 2487.0682   | 84.5047         | 0.0118        | <b>0.063</b>               | <b>29.5</b> |
| 124.7981    | 2.3430          | 0.0003        | <b>0.002</b>               | <b>2.2</b>  |
| 3266.426358 | 172.1138442     | 0.0058        | 0.0310                     | 19.0        |
| 3409.513225 | 184.2705162     | 0.0054        | 0.0289                     | 18.5        |
| 3492.284532 | 176.7324182     | 0.0057        | 0.0302                     | 19.8        |
| 3389.4080   | 177.7056        | 0.0056        | <b>0.030</b>               | <b>19.1</b> |
| 114.2635    | 6.1365          | 0.0002        | <b>0.001</b>               | <b>0.6</b>  |
| 1938.900987 | 48.85778333     | 0.0205        | 0.1092                     | 39.7        |
| 1807.984185 | 50.98783        | 0.0196        | 0.1046                     | 35.5        |
| 1814.66076  | 50.32519626     | 0.0199        | 0.1060                     | 36.1        |
| 1853.8486   | 50.0569         | 0.0200        | <b>0.107</b>               | <b>37.1</b> |
| 73.7331     | 1.0901          | 0.0004        | <b>0.002</b>               | <b>2.3</b>  |

| 1/[S] | 0.0020 | 0.0100 | 0.0200 | 0.1000 |
|-------|--------|--------|--------|--------|
|-------|--------|--------|--------|--------|

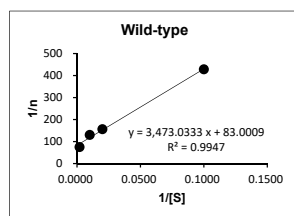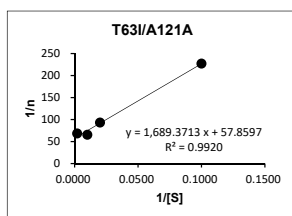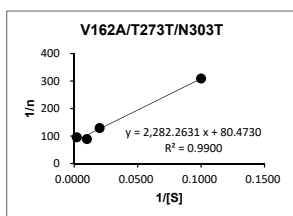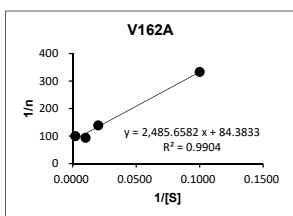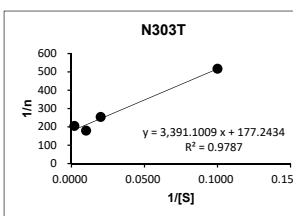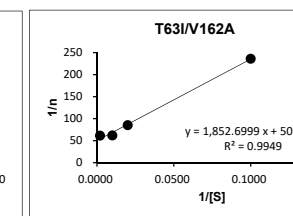

Supplement: 13068_2019_1474_MOESM11_ESM.pdf [file 13068_2019_1474_MOESM11_ESM.pdf]
