# Supplementary material for: Molecular evolutionary engineering of xylose isomerase to improve its catalytic activity and performance of micro-aerobic glucose/xylose co-fermentation in Saccharomyces cerevisiae
Source: PubMed Central journal article supplement (PMC6551904; doi:10.1186/s13068-019-1474-z), 2019-06-06
Supplement: 13068_2019_1474_MOESM1_ESM.pdf [file 13068_2019_1474_MOESM1_ESM.pdf]

| Strains  | Genotype                                                                        | Source     |
|----------|---------------------------------------------------------------------------------|------------|
| IR-2     | <i>Mata/a</i>                                                                   | [25]       |
| 2a-3-34A | <i>IR-2 Mata ho::bleMX6</i>                                                     | Lab stock  |
| SS29     | <i>2a-3-34A; gre3::hphMX6</i>                                                   | This study |
| SS36     | <i>SS29 [pUG35-kan-pHSP12-tCYC1-pPGK1-XKSI-tCYC1]</i>                           | This study |
| SS37     | <i>SS29 [pUG35-kan-pHSP12-BcXI-tCYC1-pPGK1-XKSI-tCYC1]</i>                      | This study |
| SS38     | <i>SS29 [pUG35-kan-pHSP12-PrXI-tCYC1-pPGK1-XKSI-tCYC1]</i>                      | This study |
| SS39     | <i>SS29 [pUG35-kan-pHSP12-RfXI-tCYC1-pPGK1-XKSI-tCYC1]</i>                      | This study |
| SS40     | <i>SS29 [pUG35-kan-pHSP12-OspXI-tCYC1-pPGK1-XKSI-tCYC1]</i>                     | This study |
| SS41     | <i>SS29 [pUG35-kan-pHSP12-PspXI-tCYC1-pPGK1-XKSI-tCYC1]</i>                     | This study |
| SS42     | <i>SS29 [pUG35-kan-pHSP12-LpXI-tCYC1-pPGK1-XKSI-tCYC1]</i>                      | This study |
| SS43     | <i>SS29 [pUG35-kan-pHSP12-RcXI-tCYC1-pPGK1-XKSI-tCYC1]</i>                      | This study |
| SS44     | <i>SS29 [pUG35-kan-pHSP12-SrXI-tCYC1-pPGK1-XKSI-tCYC1]</i>                      | This study |
| SS45     | <i>SS29 [pUG35-kan-pHSP12-RfXI[G179A]-pPGK1-XKSI-tCYC1]</i>                     | This study |
| SS46     | <i>SS29 [pUG35-kan-pHSP12-PspXI[E15D]-tCYC1-pPGK1-XKSI-tCYC1]</i>               | This study |
| SS47     | <i>SS29 [pUG35-kan-pHSP12-PspXI[C54R]-tCYC1-pPGK1-XKSI-tCYC1]</i>               | This study |
| SS48     | <i>SS29 [pUG35-kan-pHSP12-PspXI[T142S]-tCYC1-pPGK1-XKSI-tCYC1]</i>              | This study |
| SS49     | <i>SS29 [pUG35-kan-pHSP12-PspXI[N370S]-tCYC1-pPGK1-XKSI-tCYC1]</i>              | This study |
| SS50     | <i>SS29 [pUG35-kan-pHSP12-PspXI[C54R,N370S]-tCYC1-pPGK1-XKSI-tCYC1]</i>         | This study |
| SS51     | <i>SS29 [pUG35-kan-pHSP12-PspXI[E15D,T142S]-tCYC1-pPGK1-XKSI-tCYC1]</i>         | This study |
| SS81     | <i>SS29 aur1::kanMX6-pHSP12-LpXI-tCYC1-pPGK1-XKSI-CYC1t-AUR1-C</i>              | This study |
| SS82     | <i>SS29 aur1::kanMX6-pHSP12-LpXI[T63I]-tCYC1-pPGK1-XKSI-tCYC1-AUR1-C</i>        | This study |
| SS84     | <i>SS29 aur1::kanMX6-pHSP12-LpXI[K136T,A176T]-tCYC1-pPGK1-XKSI-tCYC1-AUR1-C</i> | This study |
| SS85     | <i>SS29 aur1::kanMX6-pHSP12-LpXI[Y13H,D228V]-tCYC1-pPGK1-XKSI-tCYC1-AUR1-C</i>  | This study |
| SS86     | <i>SS29 aur1::kanMX6-pHSP12-LpXI[T273A]-tCYC1-pPGK1-XKSI-tCYC1-AUR1-C</i>       | This study |
| SS87     | <i>SS29 aur1::kanMX6-pHSP12-LpXI[D207G]-tCYC1-pPGK1-XKSI-tCYC1-AUR1-C</i>       | This study |
| SS88     | <i>SS29 aur1::kanMX6-pHSP12-LpXI[N223I]-tCYC1-pPGK1-XKSI-tCYC1-AUR1-C</i>       | This study |
| SS89     | <i>SS29 aur1::kanMX6-pHSP12-LpXI[L78S]-tCYC1-pPGK1-XKSI-tCYC1-AUR1-C</i>        | This study |
| SS91     | <i>SS29 aur1::kanMX6-pHSP12-LpXI[E114G]-tCYC1-pPGK1-XKSI-tCYC1-AUR1-C</i>       | This study |
| SS92     | <i>SS29 aur1::kanMX6-pHSP12-LpXI[V162A,N303T]-tCYC1-pPGK1-XKSI-tCYC1-AUR1-C</i> | This study |
| SS93     | <i>SS29 aur1::kanMX6-pHSP12-LpXI[R191K,E192K]-tCYC1-pPGK1-XKSI-tCYC1-AUR1-C</i> | This study |
| SS94     | <i>SS29 aur1::kanMX6-pHSP12-LpXI[L304S]-tCYC1-pPGK1-XKSI-tCYC1-AUR1-C</i>       | This study |
| SS104    | <i>SS29 aur1::kanMX6-pHSP12-LpXI[V162A]-tCYC1-pPGK1-XKSI-tCYC1-AUR1-C</i>       | This study |
| SS105    | <i>SS29 aur1::kanMX6-pHSP12-LpXI[N303T]-tCYC1-pPGK1-XKSI-tCYC1-AUR1-C</i>       | This study |
| SS120    | <i>SS29 aur1::kanMX6-pHSP12-LpXI[T63I,V162A]-tCYC1-pPGK1-XKSI-tCYC1-AUR1-C</i>  | This study |
