# Supplementary material for: Molecular evolutionary engineering of xylose isomerase to improve its catalytic activity and performance of micro-aerobic glucose/xylose co-fermentation in Saccharomyces cerevisiae
Source: PubMed Central journal article supplement (PMC6551904; doi:10.1186/s13068-019-1474-z), 2019-06-06
Supplement: 13068_2019_1474_MOESM2_ESM.pdf [file 13068_2019_1474_MOESM2_ESM.pdf]

| Strains | Time (h) | Glucose      | Xylose       | Xylitol     | Glycerol    | Acetate      | Ethanol      |
|---------|----------|--------------|--------------|-------------|-------------|--------------|--------------|
| SS36    | Input    | 83.35 ± 2.09 | 35.31 ± 0.99 | n.d.        | n.d.        | n.d.         | n.d.         |
|         | 0        | 81.93 ± 2.24 | 35.03 ± 1.15 | n.d.        | n.d.        | n.d.         | 0.44 ± 0.38  |
|         | 1        | 74.48 ± 1.68 | 34.26 ± 0.75 | 0.19 ± 0.33 | 1.04 ± 0.22 | n.d.         | 3.48 ± 0.81  |
|         | 3        | 53.18 ± 5.31 | 33.35 ± 0.49 | 0.21 ± 0.36 | 2.48 ± 0.28 | n.d.         | 12.34 ± 1.96 |
|         | 6        | 2.92 ± 3.66  | 32.66 ± 1.25 | 0.53 ± 0.48 | 4.58 ± 0.41 | 0.84 ± 0.19  | 34.95 ± 2.40 |
|         | 12       | n.d.         | 32.59 ± 0.93 | 0.77 ± 0.17 | 4.74 ± 0.23 | 0.90 ± 0.19  | 36.12 ± 1.04 |
|         | 24       | n.d.         | 35.04 ± 1.25 | 0.90 ± 0.19 | 5.12 ± 0.33 | 0.99 ± 0.20  | 36.99 ± 0.53 |
|         | 36       | n.d.         | 34.55 ± 1.10 | 0.99 ± 0.17 | 5.09 ± 0.31 | 1.05 ± 0.19  | 37.73 ± 0.61 |
|         | 48       | n.d.         | 33.41 ± 0.95 | 1.07 ± 0.19 | 4.94 ± 0.33 | 1.12 ± 0.19  | 37.79 ± 0.60 |
|         | 60       | n.d.         | 32.70 ± 1.21 | 1.16 ± 0.21 | 4.87 ± 0.35 | 1.19 ± 0.21  | 37.41 ± 0.67 |
| 72      | n.d.     | 31.80 ± 1.16 | 1.24 ± 0.21  | 4.77 ± 0.32 | 1.26 ± 0.21 | 37.25 ± 1.02 |              |
| SS37    | Input    | 83.35 ± 2.09 | 35.31 ± 0.99 | n.d.        | n.d.        | n.d.         | n.d.         |
|         | 0        | 82.32 ± 2.21 | 35.11 ± 1.24 | n.d.        | n.d.        | n.d.         | 0.20 ± 0.35  |
|         | 1        | 75.15 ± 1.75 | 34.35 ± 1.28 | 0.19 ± 0.33 | 1.01 ± 0.27 | n.d.         | 3.26 ± 0.86  |
|         | 3        | 54.87 ± 4.56 | 33.52 ± 1.66 | 0.41 ± 0.37 | 2.43 ± 0.34 | n.d.         | 11.72 ± 1.56 |
|         | 6        | 3.55 ± 4.54  | 33.19 ± 1.25 | 0.74 ± 0.19 | 4.67 ± 0.46 | 0.83 ± 0.20  | 35.03 ± 2.69 |
|         | 12       | n.d.         | 33.41 ± 0.63 | 0.76 ± 0.20 | 4.86 ± 0.30 | 0.90 ± 0.18  | 36.69 ± 1.61 |
|         | 24       | n.d.         | 34.77 ± 0.75 | 0.90 ± 0.21 | 5.08 ± 0.31 | 0.98 ± 0.17  | 37.09 ± 0.30 |
|         | 36       | n.d.         | 34.55 ± 0.80 | 0.99 ± 0.22 | 5.07 ± 0.37 | 1.06 ± 0.18  | 38.06 ± 0.19 |
|         | 48       | n.d.         | 33.26 ± 0.82 | 1.05 ± 0.22 | 4.93 ± 0.35 | 1.13 ± 0.18  | 37.56 ± 0.86 |
|         | 60       | n.d.         | 33.10 ± 0.50 | 1.15 ± 0.22 | 4.90 ± 0.30 | 1.21 ± 0.18  | 37.55 ± 1.19 |
| 72      | n.d.     | 32.26 ± 0.85 | 1.21 ± 0.24  | 4.82 ± 0.35 | 1.29 ± 0.19 | 37.60 ± 0.88 |              |
| SS38    | Input    | 83.35 ± 2.09 | 35.31 ± 0.99 | n.d.        | n.d.        | n.d.         | n.d.         |
|         | 0        | 81.83 ± 1.52 | 34.97 ± 0.93 | n.d.        | n.d.        | n.d.         | 0.21 ± 0.36  |
|         | 1        | 73.95 ± 1.72 | 34.18 ± 1.15 | 0.19 ± 0.33 | 1.10 ± 0.25 | n.d.         | 3.66 ± 0.76  |
|         | 3        | 52.23 ± 4.39 | 33.44 ± 0.94 | 0.39 ± 0.34 | 2.62 ± 0.27 | 0.46 ± 0.44  | 12.88 ± 1.44 |
|         | 6        | 1.16 ± 1.35  | 31.96 ± 1.20 | 0.73 ± 0.18 | 4.71 ± 0.36 | 0.87 ± 0.19  | 36.18 ± 1.36 |
|         | 12       | n.d.         | 30.48 ± 0.94 | 0.80 ± 0.17 | 4.83 ± 0.29 | 0.91 ± 0.19  | 37.32 ± 0.68 |

|      |       |                  |                  |                 |                 |                 |                  |
|------|-------|------------------|------------------|-----------------|-----------------|-----------------|------------------|
|      | 24    | n.d.             | $30.75 \pm 0.52$ | $1.03 \pm 0.2$  | $5.27 \pm 0.27$ | $1.00 \pm 0.19$ | $38.88 \pm 0.77$ |
|      | 36    | n.d.             | $28.52 \pm 0.31$ | $1.22 \pm 0.21$ | $5.21 \pm 0.27$ | $1.06 \pm 0.18$ | $39.92 \pm 0.93$ |
|      | 48    | n.d.             | $26.62 \pm 0.32$ | $1.40 \pm 0.22$ | $5.16 \pm 0.25$ | $1.12 \pm 0.19$ | $40.51 \pm 1.07$ |
|      | 60    | n.d.             | $24.62 \pm 0.63$ | $1.57 \pm 0.22$ | $5.12 \pm 0.29$ | $1.19 \pm 0.19$ | $41.13 \pm 1.26$ |
|      | 72    | n.d.             | $22.85 \pm 0.76$ | $1.74 \pm 0.23$ | $5.11 \pm 0.31$ | $1.25 \pm 0.20$ | $41.52 \pm 1.03$ |
|      | Input | $83.35 \pm 2.09$ | $35.31 \pm 0.99$ | n.d.            | n.d.            | n.d.            | n.d.             |
|      | 0     | $81.55 \pm 2.66$ | $34.80 \pm 1.41$ | n.d.            | n.d.            | n.d.            | $0.19 \pm 0.33$  |
|      | 1     | $73.78 \pm 4.10$ | $33.82 \pm 1.41$ | $0.18 \pm 0.32$ | $1.02 \pm 0.20$ | n.d.            | $3.37 \pm 0.70$  |
|      | 3     | $51.57 \pm 6.41$ | $32.63 \pm 1.62$ | $0.4 \pm 0.35$  | $2.50 \pm 0.28$ | $0.28 \pm 0.49$ | $12.43 \pm 1.62$ |
|      | 6     | $2.71 \pm 2.48$  | $33.25 \pm 2.26$ | $0.76 \pm 0.15$ | $4.87 \pm 0.44$ | $0.89 \pm 0.24$ | $35.77 \pm 1.55$ |
| SS39 | 12    | n.d.             | $29.41 \pm 2.03$ | $0.80 \pm 0.15$ | $4.87 \pm 0.33$ | $0.91 \pm 0.22$ | $37.83 \pm 0.96$ |
|      | 24    | n.d.             | $29.10 \pm 1.27$ | $1.02 \pm 0.13$ | $5.43 \pm 0.20$ | $1.01 \pm 0.22$ | $39.95 \pm 0.39$ |
|      | 36    | n.d.             | $25.68 \pm 1.26$ | $1.18 \pm 0.14$ | $5.38 \pm 0.25$ | $1.06 \pm 0.22$ | $41.37 \pm 0.77$ |
|      | 48    | n.d.             | $22.97 \pm 1.49$ | $1.30 \pm 0.18$ | $5.41 \pm 0.30$ | $1.11 \pm 0.23$ | $42.48 \pm 1.73$ |
|      | 60    | n.d.             | $20.10 \pm 1.43$ | $1.44 \pm 0.16$ | $5.32 \pm 0.29$ | $1.17 \pm 0.23$ | $42.70 \pm 0.90$ |
|      | 72    | n.d.             | $17.96 \pm 1.52$ | $1.59 \pm 0.13$ | $5.33 \pm 0.25$ | $1.23 \pm 0.23$ | $43.86 \pm 0.80$ |
|      | Input | $83.35 \pm 2.09$ | $35.31 \pm 0.99$ | n.d.            | n.d.            | n.d.            | n.d.             |
|      | 0     | $83.31 \pm 1.53$ | $35.59 \pm 0.97$ | n.d.            | n.d.            | n.d.            | $0.19 \pm 0.33$  |
|      | 1     | $72.66 \pm 2.29$ | $33.35 \pm 1.01$ | $0.18 \pm 0.32$ | $1.01 \pm 0.23$ | n.d.            | $3.42 \pm 0.69$  |
|      | 3     | $51.13 \pm 4.25$ | $32.65 \pm 1.25$ | $0.39 \pm 0.34$ | $2.51 \pm 0.18$ | $0.28 \pm 0.49$ | $12.80 \pm 0.97$ |
|      | 6     | $1.07 \pm 1.07$  | $31.76 \pm 1.37$ | $0.72 \pm 0.17$ | $4.56 \pm 0.27$ | $0.83 \pm 0.18$ | $36.00 \pm 1.15$ |
| SS40 | 12    | n.d.             | $29.81 \pm 1.19$ | $0.77 \pm 0.18$ | $4.61 \pm 0.23$ | $0.89 \pm 0.20$ | $37.24 \pm 0.91$ |
|      | 24    | n.d.             | $30.77 \pm 1.68$ | $0.98 \pm 0.18$ | $5.12 \pm 0.19$ | $0.98 \pm 0.21$ | $38.95 \pm 0.52$ |
|      | 36    | n.d.             | $28.89 \pm 1.77$ | $1.11 \pm 0.16$ | $5.16 \pm 0.15$ | $1.04 \pm 0.21$ | $40.39 \pm 0.82$ |
|      | 48    | n.d.             | $26.17 \pm 2.28$ | $1.25 \pm 0.20$ | $5.05 \pm 0.21$ | $1.08 \pm 0.21$ | $40.66 \pm 0.95$ |
|      | 60    | n.d.             | $24.36 \pm 3.17$ | $1.41 \pm 0.22$ | $5.07 \pm 0.22$ | $1.16 \pm 0.24$ | $41.48 \pm 1.20$ |
|      | 72    | n.d.             | $22.72 \pm 3.40$ | $1.58 \pm 0.25$ | $5.04 \pm 0.39$ | $1.22 \pm 0.23$ | $41.24 \pm 1.19$ |
|      | Input | $83.35 \pm 2.09$ | $35.31 \pm 0.99$ | n.d.            | n.d.            | n.d.            | n.d.             |
| SS41 | 0     | $80.81 \pm 1.82$ | $34.50 \pm 1.06$ | n.d.            | n.d.            | n.d.            | n.d.             |
|      | 1     | $71.86 \pm 2.23$ | $33.31 \pm 1.49$ | $0.19 \pm 0.33$ | $0.76 \pm 0.71$ | n.d.            | $3.74 \pm 0.81$  |
|      | 3     | $49.61 \pm 4.13$ | $32.98 \pm 2.24$ | $0.43 \pm 0.39$ | $2.59 \pm 0.46$ | $0.29 \pm 0.51$ | $13.51 \pm 1.72$ |

|      |       |                  |                  |                 |                 |                 |                  |
|------|-------|------------------|------------------|-----------------|-----------------|-----------------|------------------|
|      | 6     | $1.26 \pm 1.29$  | $32.79 \pm 1.09$ | $0.72 \pm 0.20$ | $4.63 \pm 0.36$ | $0.83 \pm 0.19$ | $35.77 \pm 0.84$ |
|      | 12    | n.d.             | $31.11 \pm 0.93$ | $0.74 \pm 0.21$ | $4.54 \pm 0.35$ | $0.89 \pm 0.18$ | $36.32 \pm 1.02$ |
|      | 24    | n.d.             | $33.52 \pm 0.93$ | $0.93 \pm 0.20$ | $4.96 \pm 0.37$ | $0.96 \pm 0.17$ | $37.59 \pm 0.71$ |
|      | 36    | n.d.             | $32.80 \pm 0.45$ | $1.04 \pm 0.20$ | $4.91 \pm 0.32$ | $1.03 \pm 0.17$ | $38.33 \pm 0.24$ |
|      | 48    | n.d.             | $32.12 \pm 1.51$ | $1.17 \pm 0.22$ | $4.90 \pm 0.45$ | $1.09 \pm 0.18$ | $37.78 \pm 0.85$ |
|      | 60    | n.d.             | $30.52 \pm 1.21$ | $1.24 \pm 0.23$ | $4.73 \pm 0.37$ | $1.16 \pm 0.18$ | $38.03 \pm 1.04$ |
|      | 72    | n.d.             | $30.34 \pm 2.13$ | $1.38 \pm 0.27$ | $4.78 \pm 0.54$ | $1.23 \pm 0.18$ | $37.76 \pm 0.93$ |
|      | Input | $83.35 \pm 2.09$ | $35.31 \pm 0.99$ | n.d.            | n.d.            | n.d.            | n.d.             |
|      | 0     | $81.71 \pm 0.87$ | $34.79 \pm 0.52$ | n.d.            | n.d.            | n.d.            | $0.19 \pm 0.34$  |
|      | 1     | $72.41 \pm 3.12$ | $33.48 \pm 1.45$ | $0.19 \pm 0.34$ | $1.07 \pm 0.29$ | n.d.            | $3.68 \pm 1.00$  |
|      | 3     | $49.06 \pm 5.20$ | $32.70 \pm 1.46$ | $0.24 \pm 0.42$ | $2.69 \pm 0.41$ | $0.29 \pm 0.51$ | $13.94 \pm 2.01$ |
|      | 6     | $1.00 \pm 1.31$  | $31.05 \pm 0.59$ | $0.72 \pm 0.11$ | $4.70 \pm 0.31$ | $0.84 \pm 0.19$ | $36.74 \pm 1.39$ |
| SS42 | 12    | n.d.             | $25.47 \pm 1.05$ | $0.83 \pm 0.18$ | $4.73 \pm 0.31$ | $0.89 \pm 0.21$ | $38.91 \pm 1.18$ |
|      | 24    | n.d.             | $23.60 \pm 0.73$ | $1.13 \pm 0.16$ | $5.44 \pm 0.36$ | $0.98 \pm 0.21$ | $42.03 \pm 0.77$ |
|      | 36    | n.d.             | $19.10 \pm 0.68$ | $1.35 \pm 0.18$ | $5.44 \pm 0.36$ | $1.01 \pm 0.21$ | $43.72 \pm 0.74$ |
|      | 48    | n.d.             | $15.46 \pm 0.53$ | $1.52 \pm 0.17$ | $5.39 \pm 0.28$ | $1.05 \pm 0.21$ | $45.58 \pm 1.23$ |
|      | 60    | n.d.             | $12.51 \pm 1.07$ | $1.68 \pm 0.20$ | $5.31 \pm 0.31$ | $1.09 \pm 0.22$ | $46.76 \pm 0.71$ |
|      | 72    | n.d.             | $9.96 \pm 1.08$  | $1.80 \pm 0.21$ | $5.33 \pm 0.34$ | $1.13 \pm 0.23$ | $47.62 \pm 1.24$ |
|      | Input | $83.35 \pm 2.09$ | $35.31 \pm 0.99$ | n.d.            | n.d.            | n.d.            | n.d.             |
|      | 0     | $81.41 \pm 2.03$ | $34.61 \pm 1.10$ | n.d.            | n.d.            | n.d.            | n.d.             |
|      | 1     | $74.24 \pm 2.00$ | $33.84 \pm 0.75$ | $0.18 \pm 0.31$ | $0.97 \pm 0.20$ | n.d.            | $3.17 \pm 0.73$  |
|      | 3     | $55.07 \pm 4.68$ | $33.27 \pm 1.49$ | $0.22 \pm 0.38$ | $2.32 \pm 0.32$ | $0.45 \pm 0.43$ | $11.23 \pm 1.72$ |
|      | 6     | $5.36 \pm 6.52$  | $32.60 \pm 1.04$ | $0.65 \pm 0.12$ | $4.38 \pm 0.36$ | $0.88 \pm 0.21$ | $34.06 \pm 3.20$ |
| SS43 | 12    | n.d.             | $32.24 \pm 1.46$ | $0.71 \pm 0.18$ | $4.55 \pm 0.33$ | $0.94 \pm 0.21$ | $36.72 \pm 1.30$ |
|      | 24    | n.d.             | $34.43 \pm 0.82$ | $0.86 \pm 0.16$ | $4.89 \pm 0.26$ | $1.02 \pm 0.19$ | $37.33 \pm 0.64$ |
|      | 36    | n.d.             | $34.26 \pm 0.51$ | $0.96 \pm 0.16$ | $4.88 \pm 0.22$ | $1.11 \pm 0.19$ | $38.01 \pm 0.64$ |
|      | 48    | n.d.             | $32.91 \pm 1.10$ | $1.02 \pm 0.22$ | $4.73 \pm 0.28$ | $1.18 \pm 0.21$ | $37.52 \pm 0.81$ |
|      | 60    | n.d.             | $32.39 \pm 1.21$ | $1.11 \pm 0.24$ | $4.67 \pm 0.33$ | $1.27 \pm 0.22$ | $37.27 \pm 0.65$ |
|      | 72    | n.d.             | $32.20 \pm 1.13$ | $1.20 \pm 0.26$ | $4.66 \pm 0.19$ | $1.35 \pm 0.24$ | $37.02 \pm 0.90$ |
| SS44 | Input | $83.35 \pm 2.09$ | $35.31 \pm 0.99$ | n.d.            | n.d.            | n.d.            | n.d.             |
|      | 0     | $81.81 \pm 0.91$ | $34.83 \pm 0.69$ | n.d.            | n.d.            | n.d.            | n.d.             |

|    |              |              |             |             |             |              |
|----|--------------|--------------|-------------|-------------|-------------|--------------|
| 1  | 72.30 ± 1.14 | 33.01 ± 0.31 | 0.19 ± 0.32 | 0.99 ± 0.23 | n.d.        | 3.20 ± 0.72  |
| 3  | 53.96 ± 3.70 | 32.72 ± 1.41 | 0.23 ± 0.40 | 2.39 ± 0.26 | n.d.        | 11.52 ± 1.43 |
| 6  | 3.34 ± 4.18  | 31.96 ± 0.89 | 0.72 ± 0.19 | 4.55 ± 0.36 | 0.87 ± 0.18 | 34.43 ± 2.23 |
| 12 | n.d.         | 31.92 ± 1.03 | 0.75 ± 0.18 | 4.70 ± 0.26 | 0.91 ± 0.17 | 35.77 ± 0.53 |
| 24 | n.d.         | 34.41 ± 1.03 | 0.91 ± 0.17 | 5.09 ± 0.30 | 1.00 ± 0.16 | 37.12 ± 0.75 |
| 36 | n.d.         | 33.58 ± 0.79 | 0.99 ± 0.20 | 4.99 ± 0.29 | 1.06 ± 0.17 | 37.05 ± 0.52 |
| 48 | n.d.         | 32.61 ± 0.99 | 1.06 ± 0.22 | 4.86 ± 0.33 | 1.13 ± 0.18 | 37.16 ± 0.68 |
| 60 | n.d.         | 32.23 ± 0.78 | 1.15 ± 0.23 | 4.87 ± 0.31 | 1.21 ± 0.20 | 37.25 ± 0.73 |
| 72 | n.d.         | 32.03 ± 1.10 | 1.24 ± 0.26 | 4.88 ± 0.32 | 1.29 ± 0.18 | 36.86 ± 0.74 |

---
