# Supplementary material for: Molecular evolutionary engineering of xylose isomerase to improve its catalytic activity and performance of micro-aerobic glucose/xylose co-fermentation in Saccharomyces cerevisiae
Source: PubMed Central journal article supplement (PMC6551904; doi:10.1186/s13068-019-1474-z), 2019-06-06
Supplement: 13068_2019_1474_MOESM3_ESM.pdf [file 13068_2019_1474_MOESM3_ESM.pdf]

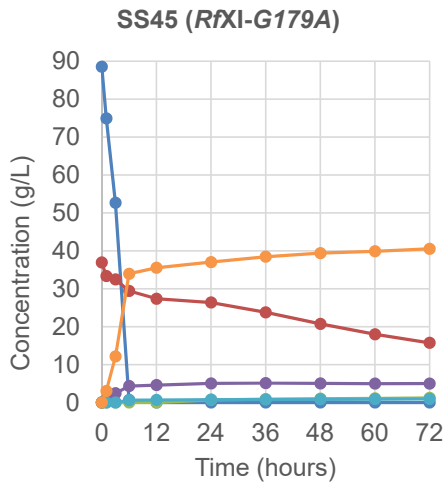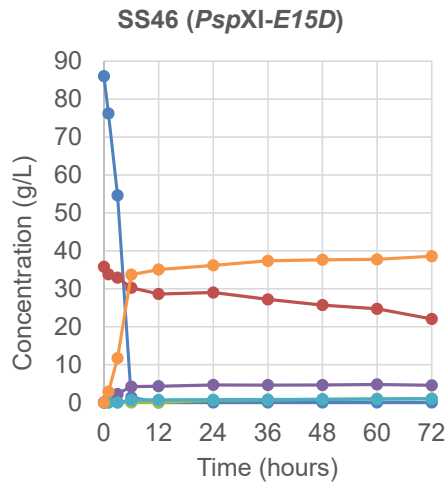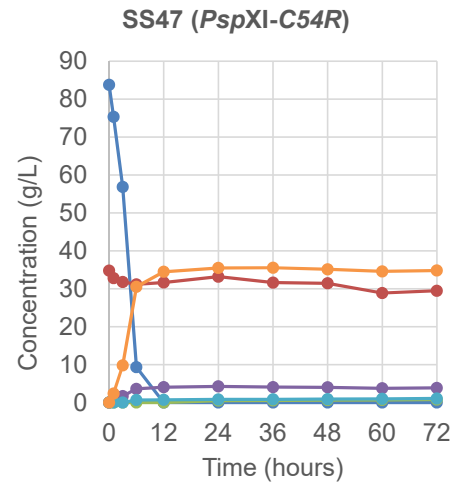

● Glucose ● Xylose ● Xylitol  
● Glycerol ● Acetate ● Ethanol

● Glucose ● Xylose ● Xylitol  
● Glycerol ● Acetate ● Ethanol

● Glucose ● Xylose ● Xylitol  
● Glycerol ● Acetate ● Ethanol

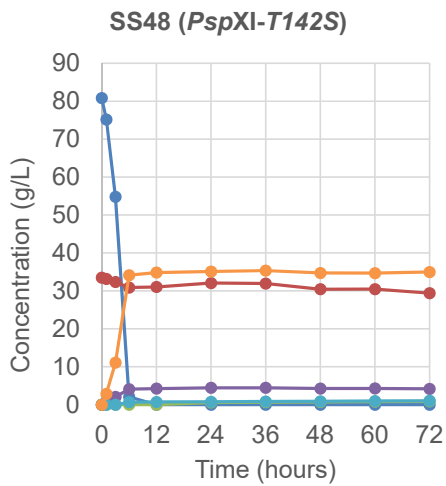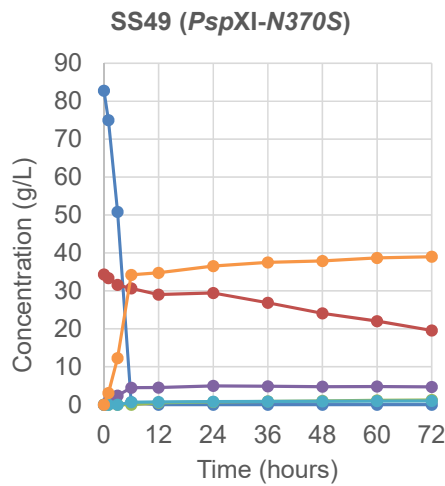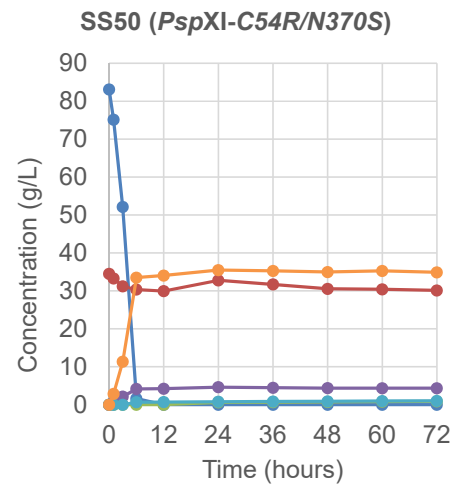

● Glucose ● Xylose ● Xylitol  
● Glycerol ● Acetate ● Ethanol

● Glucose ● Xylose ● Xylitol  
● Glycerol ● Acetate ● Ethanol

● Glucose ● Xylose ● Xylitol  
● Glycerol ● Acetate ● Ethanol

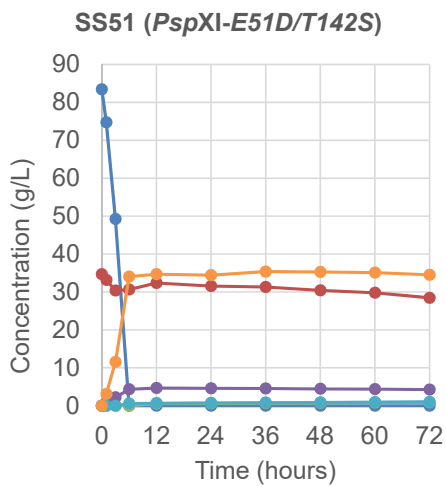

● Glucose ● Xylose ● Xylitol  
● Glycerol ● Acetate ● Ethanol
