# Supplementary material for: Molecular evolutionary engineering of xylose isomerase to improve its catalytic activity and performance of micro-aerobic glucose/xylose co-fermentation in Saccharomyces cerevisiae
Source: PubMed Central journal article supplement (PMC6551904; doi:10.1186/s13068-019-1474-z), 2019-06-06
Supplement: 13068_2019_1474_MOESM4_ESM.pdf [file 13068_2019_1474_MOESM4_ESM.pdf]

| Strain | Time (h) | Glucose | Xylose | Xylitol | Glycerol | Acetate | Ethanol |
|--------|----------|---------|--------|---------|----------|---------|---------|
| SS45   | Input    | 83.04   | 34.23  | n.d.    | n.d.     | n.d.    | n.d.    |
|        | 0        | 88.54   | 36.93  | n.d.    | n.d.     | n.d.    | n.d.    |
|        | 1        | 74.93   | 33.37  | n.d.    | 0.85     | n.d.    | 3.04    |
|        | 3        | 52.67   | 32.45  | n.d.    | 2.45     | n.d.    | 12.18   |
|        | 6        | 0.69    | 29.43  | n.d.    | 4.36     | 0.62    | 33.96   |
|        | 12       | n.d.    | 27.38  | n.d.    | 4.61     | 0.70    | 35.53   |
|        | 24       | n.d.    | 26.39  | 0.74    | 5.05     | 0.77    | 37.04   |
|        | 36       | n.d.    | 23.79  | 0.89    | 5.12     | 0.82    | 38.44   |
|        | 48       | n.d.    | 20.75  | 1.02    | 5.05     | 0.86    | 39.41   |
|        | 60       | n.d.    | 18.00  | 1.12    | 5.00     | 0.90    | 39.88   |
|        | 72       | n.d.    | 15.75  | 1.24    | 5.01     | 0.94    | 40.54   |
| SS46   | Input    | 83.04   | 34.23  | n.d.    | n.d.     | n.d.    | n.d.    |
|        | 0        | 86.04   | 35.82  | n.d.    | n.d.     | n.d.    | n.d.    |
|        | 1        | 76.23   | 33.81  | n.d.    | 0.79     | n.d.    | 2.88    |
|        | 3        | 54.61   | 32.95  | n.d.    | 2.28     | n.d.    | 11.70   |
|        | 6        | 1.40    | 30.28  | n.d.    | 4.20     | 0.66    | 33.73   |
|        | 12       | n.d.    | 28.63  | n.d.    | 4.31     | 0.70    | 35.08   |
|        | 24       | n.d.    | 29.03  | 0.64    | 4.66     | 0.75    | 36.17   |
|        | 36       | n.d.    | 27.20  | 0.74    | 4.61     | 0.80    | 37.38   |
|        | 48       | n.d.    | 25.71  | 0.84    | 4.63     | 0.85    | 37.65   |
|        | 60       | n.d.    | 24.72  | 0.97    | 4.77     | 0.92    | 37.76   |
|        | 72       | n.d.    | 22.04  | 1.08    | 4.55     | 0.97    | 38.58   |
| SS47   | Input    | 83.04   | 34.23  | n.d.    | n.d.     | n.d.    | n.d.    |
|        | 0        | 83.76   | 34.78  | n.d.    | n.d.     | n.d.    | n.d.    |
|        | 1        | 75.33   | 32.82  | n.d.    | 0.63     | n.d.    | 2.40    |
|        | 3        | 56.87   | 31.81  | n.d.    | 1.71     | n.d.    | 9.80    |
|        | 6        | 9.33    | 31.17  | n.d.    | 3.62     | 0.68    | 30.55   |
|        | 12       | n.d.    | 31.65  | n.d.    | 4.05     | 0.73    | 34.48   |

|      |       |       |       |      |      |      |       |
|------|-------|-------|-------|------|------|------|-------|
|      | 24    | n.d.  | 33.21 | 0.51 | 4.27 | 0.83 | 35.51 |
|      | 36    | n.d.  | 31.64 | 0.56 | 4.09 | 0.86 | 35.55 |
|      | 48    | n.d.  | 31.44 | 0.65 | 4.03 | 0.93 | 35.15 |
|      | 60    | n.d.  | 28.88 | 0.68 | 3.78 | 0.99 | 34.59 |
|      | 72    | n.d.  | 29.48 | 0.79 | 3.88 | 1.08 | 34.83 |
|      | Input | 83.04 | 34.23 | n.d. | n.d. | n.d. | n.d.  |
|      | 0     | 80.84 | 33.48 | 0.00 | 0.00 | 0.00 | 0.00  |
|      | 1     | 75.18 | 33.16 | 0.00 | 0.74 | 0.00 | 2.86  |
|      | 3     | 54.79 | 32.34 | 0.00 | 2.07 | 0.00 | 11.08 |
|      | 6     | 2.07  | 30.90 | 0.00 | 4.10 | 0.66 | 34.15 |
| SS48 | 12    | 0.00  | 31.04 | 0.00 | 4.25 | 0.71 | 34.82 |
|      | 24    | 0.00  | 32.07 | 0.57 | 4.45 | 0.77 | 35.10 |
|      | 36    | 0.00  | 31.94 | 0.65 | 4.44 | 0.84 | 35.35 |
|      | 48    | 0.00  | 30.44 | 0.71 | 4.27 | 0.89 | 34.73 |
|      | 60    | 0.00  | 30.46 | 0.80 | 4.29 | 0.96 | 34.67 |
|      | 72    | 0.00  | 29.40 | 0.86 | 4.17 | 1.03 | 34.99 |
|      | Input | 83.04 | 34.23 | n.d. | n.d. | n.d. | n.d.  |
|      | 0     | 82.79 | 34.33 | 0.00 | 0.00 | 0.00 | 0.00  |
|      | 1     | 75.02 | 33.36 | 0.00 | 0.86 | 0.00 | 3.08  |
|      | 3     | 50.85 | 31.58 | 0.00 | 2.39 | 0.00 | 12.29 |
|      | 6     | 0.67  | 30.67 | 0.00 | 4.47 | 0.64 | 34.21 |
| SS49 | 12    | 0.00  | 29.03 | 0.52 | 4.52 | 0.71 | 34.75 |
|      | 24    | 0.00  | 29.44 | 0.72 | 4.96 | 0.80 | 36.54 |
|      | 36    | 0.00  | 26.88 | 0.86 | 4.84 | 0.84 | 37.52 |
|      | 48    | 0.00  | 24.09 | 0.99 | 4.75 | 0.89 | 37.89 |
|      | 60    | 0.00  | 22.03 | 1.15 | 4.79 | 0.95 | 38.68 |
|      | 72    | 0.00  | 19.57 | 1.25 | 4.68 | 0.98 | 39.01 |
|      | Input | 83.04 | 34.23 | n.d. | n.d. | n.d. | n.d.  |
|      | 0     | 83.14 | 34.50 | 0.00 | 0.00 | 0.00 | 0.00  |
| SS50 | 1     | 75.16 | 33.28 | 0.00 | 0.79 | 0.00 | 2.84  |
|      | 3     | 52.15 | 31.23 | 0.00 | 2.13 | 0.00 | 11.35 |

|      |              |              |              |             |             |             |             |
|------|--------------|--------------|--------------|-------------|-------------|-------------|-------------|
|      | 6            | 1.61         | 30.35        | 0.00        | 4.16        | 0.65        | 33.50       |
|      | 12           | 0.00         | 29.95        | 0.00        | 4.21        | 0.69        | 34.06       |
|      | 24           | 0.00         | 32.78        | 0.62        | 4.62        | 0.78        | 35.49       |
|      | 36           | 0.00         | 31.71        | 0.65        | 4.46        | 0.83        | 35.26       |
|      | 48           | 0.00         | 30.54        | 0.71        | 4.36        | 0.88        | 34.99       |
|      | 60           | 0.00         | 30.42        | 0.79        | 4.33        | 0.97        | 35.27       |
|      | 72           | 0.00         | 30.14        | 0.87        | 4.35        | 1.02        | 34.90       |
|      | <b>Input</b> | <b>83.04</b> | <b>34.23</b> | <b>n.d.</b> | <b>n.d.</b> | <b>n.d.</b> | <b>n.d.</b> |
|      | 0            | 83.41        | 34.67        | 0.00        | 0.00        | 0.00        | 0.00        |
|      | 1            | 74.72        | 33.15        | 0.00        | 0.82        | 0.00        | 3.14        |
|      | 3            | 49.23        | 30.40        | 0.00        | 2.22        | 0.00        | 11.57       |
|      | 6            | 0.00         | 30.66        | 0.00        | 4.35        | 0.60        | 34.07       |
| SS51 | 12           | 0.00         | 32.38        | 0.56        | 4.67        | 0.70        | 34.69       |
|      | 24           | 0.00         | 31.57        | 0.62        | 4.61        | 0.76        | 34.44       |
|      | 36           | 0.00         | 31.33        | 0.73        | 4.57        | 0.83        | 35.38       |
|      | 48           | 0.00         | 30.44        | 0.77        | 4.45        | 0.89        | 35.26       |
|      | 60           | 0.00         | 29.77        | 0.85        | 4.40        | 0.96        | 35.10       |
|      | 72           | 0.00         | 28.45        | 0.91        | 4.28        | 1.03        | 34.51       |
