# Supplementary material for: Molecular evolutionary engineering of xylose isomerase to improve its catalytic activity and performance of micro-aerobic glucose/xylose co-fermentation in Saccharomyces cerevisiae
Source: PubMed Central journal article supplement (PMC6551904; doi:10.1186/s13068-019-1474-z), 2019-06-06
Supplement: 13068_2019_1474_MOESM6_ESM.pdf [file 13068_2019_1474_MOESM6_ESM.pdf]

| Strain | Time (h) | Glucose      | Xylose       | Xylitol     | Glycerol    | Acetate     | Ethanol      |
|--------|----------|--------------|--------------|-------------|-------------|-------------|--------------|
| M6-2   | Input    | 84.71 ± 0.98 | 36.01 ± 0.52 | n.d.        | n.d.        | n.d.        | n.d.         |
|        | 0        | 83.22 ± 1.70 | 35.67 ± 1.01 | n.d.        | n.d.        | n.d.        | n.d.         |
|        | 1        | 78.21 ± 1.52 | 35.60 ± 0.72 | 0.56 ± 0.57 | 1.17 ± 0.44 | n.d.        | 3.36 ± 0.64  |
|        | 3        | 57.17 ± 0.18 | 34.64 ± 0.54 | 0.61 ± 0.63 | 2.62 ± 0.52 | 0.95 ± 0.39 | 12.48 ± 1.01 |
|        | 6        | 3.55 ± 0.77  | 32.45 ± 0.12 | 0.72 ± 0.72 | 4.88 ± 0.56 | 1.21 ± 0.37 | 37.13 ± 1.40 |
|        | 12       | n.d.         | 26.04 ± 0.20 | 1.02 ± 0.51 | 5.27 ± 0.61 | 1.28 ± 0.38 | 40.73 ± 1.21 |
|        | 24       | n.d.         | 18.46 ± 1.99 | 1.35 ± 0.47 | 6.07 ± 0.61 | 1.42 ± 0.37 | 45.69 ± 2.05 |
|        | 36       | n.d.         | 10.42 ± 2.98 | 1.55 ± 0.47 | 6.26 ± 0.63 | 1.50 ± 0.36 | 49.43 ± 1.94 |
|        | 48       | n.d.         | 5.12 ± 2.11  | 1.59 ± 0.54 | 6.21 ± 0.70 | 1.53 ± 0.38 | 51.21 ± 2.57 |
|        | 60       | n.d.         | 2.48 ± 1.11  | 1.65 ± 0.48 | 6.23 ± 0.59 | 1.59 ± 0.38 | 52.90 ± 1.26 |
|        | 72       | n.d.         | 1.39 ± 0.42  | 1.81 ± 0.31 | 6.21 ± 0.54 | 1.66 ± 0.39 | 53.35 ± 0.82 |
| M6-4   | Input    | 84.61 ± 1.14 | 35.86 ± 0.78 | n.d.        | n.d.        | n.d.        | n.d.         |
|        | 0        | 82.70 ± 1.80 | 35.35 ± 1.11 | n.d.        | n.d.        | n.d.        | n.d.         |
|        | 1        | 76.75 ± 1.73 | 34.83 ± 1.11 | 0.55 ± 0.55 | 1.18 ± 0.42 | n.d.        | 3.40 ± 0.70  |
|        | 3        | 55.56 ± 0.34 | 34.22 ± 1.20 | 0.61 ± 0.62 | 2.71 ± 0.44 | 0.77 ± 0.72 | 12.73 ± 1.46 |
|        | 6        | 3.16 ± 1.23  | 32.19 ± 0.74 | 0.90 ± 0.42 | 4.88 ± 0.40 | 1.17 ± 0.41 | 36.81 ± 2.19 |
|        | 12       | n.d.         | 27.41 ± 0.67 | 1.00 ± 0.45 | 5.16 ± 0.37 | 1.26 ± 0.44 | 40.06 ± 1.57 |
|        | 24       | n.d.         | 22.04 ± 0.31 | 1.23 ± 0.36 | 5.93 ± 0.36 | 1.39 ± 0.45 | 43.79 ± 1.99 |
|        | 36       | n.d.         | 15.40 ± 0.95 | 1.48 ± 0.47 | 6.08 ± 0.37 | 1.46 ± 0.45 | 46.60 ± 2.07 |
|        | 48       | n.d.         | 9.83 ± 1.63  | 1.62 ± 0.32 | 6.10 ± 0.42 | 1.52 ± 0.46 | 48.89 ± 2.49 |
|        | 60       | n.d.         | 5.98 ± 1.47  | 1.72 ± 0.49 | 6.19 ± 0.45 | 1.59 ± 0.48 | 50.60 ± 2.22 |
|        | 72       | n.d.         | 3.47 ± 1.15  | 1.82 ± 0.41 | 6.15 ± 0.36 | 1.64 ± 0.47 | 52.08 ± 1.63 |
| M6-6   | Input    | 84.71 ± 0.98 | 36.01 ± 0.52 | n.d.        | n.d.        | n.d.        | n.d.         |
|        | 0        | 82.97 ± 1.50 | 35.58 ± 0.84 | n.d.        | n.d.        | n.d.        | n.d.         |
|        | 1        | 76.85 ± 1.13 | 35.12 ± 0.66 | 0.55 ± 0.56 | 1.22 ± 0.41 | n.d.        | 3.52 ± 0.52  |
|        | 3        | 54.44 ± 2.50 | 34.25 ± 0.60 | 0.61 ± 0.63 | 2.78 ± 0.40 | 0.98 ± 0.37 | 13.40 ± 0.82 |
|        | 6        | 1.86 ± 1.11  | 32.19 ± 0.38 | 0.93 ± 0.46 | 4.96 ± 0.44 | 1.20 ± 0.38 | 37.88 ± 1.00 |
|        | 12       | n.d.         | 26.08 ± 0.01 | 1.01 ± 0.48 | 5.2 ± 0.47  | 1.30 ± 0.38 | 40.49 ± 1.50 |
|        | 24       | n.d.         | 20.26 ± 0.37 | 1.27 ± 0.34 | 5.93 ± 0.35 | 1.43 ± 0.34 | 45.05 ± 1.11 |

|       |       |                  |                  |                 |                 |                 |                  |
|-------|-------|------------------|------------------|-----------------|-----------------|-----------------|------------------|
|       | 36    | n.d.             | $12.74 \pm 0.08$ | $1.53 \pm 0.43$ | $6.11 \pm 0.35$ | $1.51 \pm 0.32$ | $48.63 \pm 0.85$ |
|       | 48    | n.d.             | $7.25 \pm 0.48$  | $1.61 \pm 0.35$ | $6.23 \pm 0.49$ | $1.59 \pm 0.37$ | $51.00 \pm 1.27$ |
|       | 60    | n.d.             | $3.70 \pm 0.78$  | $1.74 \pm 0.42$ | $6.22 \pm 0.50$ | $1.65 \pm 0.36$ | $52.07 \pm 0.84$ |
|       | 72    | n.d.             | $1.96 \pm 0.73$  | $1.70 \pm 0.53$ | $6.14 \pm 0.53$ | $1.71 \pm 0.37$ | $52.56 \pm 1.98$ |
|       | Input | $84.61 \pm 1.14$ | $35.86 \pm 0.78$ | n.d.            | n.d.            | n.d.            | n.d.             |
|       | 0     | $82.55 \pm 1.95$ | $35.30 \pm 1.24$ | n.d.            | n.d.            | n.d.            | n.d.             |
|       | 1     | $76.95 \pm 1.76$ | $34.88 \pm 1.07$ | $0.55 \pm 0.56$ | $1.16 \pm 0.39$ | n.d.            | $3.32 \pm 0.53$  |
|       | 3     | $56.75 \pm 1.97$ | $34.27 \pm 1.18$ | $0.61 \pm 0.62$ | $2.64 \pm 0.37$ | $0.94 \pm 0.41$ | $12.16 \pm 0.38$ |
|       | 6     | $4.65 \pm 1.20$  | $32.19 \pm 0.35$ | $0.90 \pm 0.36$ | $4.83 \pm 0.33$ | $1.19 \pm 0.42$ | $36.37 \pm 0.38$ |
| M6-7  | 12    | n.d.             | $26.40 \pm 1.05$ | $0.96 \pm 0.39$ | $5.10 \pm 0.38$ | $1.23 \pm 0.42$ | $40.06 \pm 1.07$ |
|       | 24    | n.d.             | $20.77 \pm 1.41$ | $1.27 \pm 0.33$ | $5.99 \pm 0.35$ | $1.37 \pm 0.39$ | $44.89 \pm 1.22$ |
|       | 36    | n.d.             | $13.11 \pm 2.10$ | $1.55 \pm 0.40$ | $6.09 \pm 0.38$ | $1.42 \pm 0.41$ | $47.89 \pm 1.66$ |
|       | 48    | n.d.             | $7.44 \pm 2.26$  | $1.67 \pm 0.35$ | $6.25 \pm 0.48$ | $1.50 \pm 0.43$ | $50.08 \pm 2.68$ |
|       | 60    | n.d.             | $3.68 \pm 1.44$  | $1.77 \pm 0.40$ | $6.10 \pm 0.42$ | $1.54 \pm 0.42$ | $51.39 \pm 1.16$ |
|       | 72    | n.d.             | $1.91 \pm 0.87$  | $1.78 \pm 0.26$ | $6.16 \pm 0.53$ | $1.59 \pm 0.43$ | $52.13 \pm 1.55$ |
|       | Input | $84.45 \pm 1.39$ | $35.89 \pm 0.72$ | n.d.            | n.d.            | n.d.            | n.d.             |
|       | 0     | $83.44 \pm 1.72$ | $35.77 \pm 0.86$ | n.d.            | n.d.            | n.d.            | n.d.             |
|       | 1     | $76.27 \pm 0.43$ | $34.82 \pm 0.45$ | $0.57 \pm 0.57$ | $1.23 \pm 0.42$ | n.d.            | $3.55 \pm 0.66$  |
|       | 3     | $55.26 \pm 1.23$ | $34.33 \pm 0.51$ | $0.64 \pm 0.64$ | $2.75 \pm 0.55$ | $0.69 \pm 0.70$ | $13.07 \pm 1.33$ |
|       | 6     | $2.57 \pm 0.50$  | $31.74 \pm 0.64$ | $0.93 \pm 0.40$ | $4.94 \pm 0.50$ | $1.19 \pm 0.32$ | $37.66 \pm 0.99$ |
| M6-10 | 12    | n.d.             | $24.34 \pm 1.23$ | $1.11 \pm 0.43$ | $5.36 \pm 0.56$ | $1.3 \pm 0.36$  | $41.16 \pm 1.08$ |
|       | 24    | n.d.             | $13.74 \pm 2.62$ | $1.33 \pm 0.43$ | $6.1 \pm 0.94$  | $1.45 \pm 0.36$ | $47.14 \pm 2.64$ |
|       | 36    | n.d.             | $6.39 \pm 4.01$  | $1.55 \pm 0.47$ | $6.31 \pm 0.80$ | $1.50 \pm 0.34$ | $50.81 \pm 3.02$ |
|       | 48    | n.d.             | $2.99 \pm 2.47$  | $1.62 \pm 0.43$ | $6.34 \pm 0.75$ | $1.57 \pm 0.35$ | $52.15 \pm 2.74$ |
|       | 60    | n.d.             | $1.66 \pm 1.24$  | $1.66 \pm 0.34$ | $6.36 \pm 0.43$ | $1.63 \pm 0.37$ | $52.65 \pm 1.38$ |
|       | 72    | n.d.             | $0.83 \pm 0.75$  | $1.65 \pm 0.33$ | $6.29 \pm 0.35$ | $1.67 \pm 0.37$ | $52.62 \pm 0.83$ |
|       | Input | $84.45 \pm 1.39$ | $35.89 \pm 0.72$ | n.d.            | n.d.            | n.d.            | n.d.             |
|       | 0     | $82.61 \pm 1.29$ | $35.40 \pm 0.81$ | n.d.            | n.d.            | n.d.            | n.d.             |
| M6-11 | 1     | $76.14 \pm 1.14$ | $34.77 \pm 0.72$ | $0.56 \pm 0.57$ | $1.23 \pm 0.42$ | n.d.            | $3.65 \pm 0.62$  |
|       | 3     | $53.53 \pm 0.73$ | $34.05 \pm 0.51$ | $0.63 \pm 0.64$ | $2.79 \pm 0.49$ | $0.98 \pm 0.36$ | $13.73 \pm 1.08$ |
|       | 6     | $1.40 \pm 0.65$  | $32.3 \pm 0.20$  | $0.97 \pm 0.44$ | $5.08 \pm 0.46$ | $1.19 \pm 0.34$ | $39.00 \pm 1.12$ |

|       |       |                  |                  |                 |                 |                 |                  |
|-------|-------|------------------|------------------|-----------------|-----------------|-----------------|------------------|
|       | 12    | n.d.             | $23.77 \pm 0.88$ | $1.09 \pm 0.43$ | $5.24 \pm 0.56$ | $1.30 \pm 0.36$ | $41.14 \pm 1.53$ |
|       | 24    | n.d.             | $14.93 \pm 1.28$ | $1.30 \pm 0.55$ | $5.93 \pm 0.81$ | $1.43 \pm 0.36$ | $46.54 \pm 2.30$ |
|       | 36    | n.d.             | $7.09 \pm 1.88$  | $1.55 \pm 0.44$ | $6.17 \pm 0.73$ | $1.52 \pm 0.34$ | $50.44 \pm 2.81$ |
|       | 48    | n.d.             | $3.09 \pm 1.33$  | $1.64 \pm 0.40$ | $6.20 \pm 0.61$ | $1.56 \pm 0.33$ | $51.85 \pm 2.35$ |
|       | 60    | n.d.             | $1.48 \pm 0.59$  | $1.73 \pm 0.34$ | $6.44 \pm 0.41$ | $1.65 \pm 0.35$ | $53.46 \pm 1.56$ |
|       | 72    | n.d.             | $0.86 \pm 0.31$  | $1.70 \pm 0.35$ | $6.25 \pm 0.44$ | $1.68 \pm 0.36$ | $52.96 \pm 0.78$ |
|       | Input | $84.45 \pm 1.39$ | $35.89 \pm 0.72$ | n.d.            | n.d.            | n.d.            | n.d.             |
|       | 0     | $83.69 \pm 1.19$ | $35.99 \pm 0.72$ | n.d.            | n.d.            | n.d.            | n.d.             |
|       | 1     | $77.09 \pm 0.64$ | $35.24 \pm 0.52$ | $0.94 \pm 0.33$ | $1.48 \pm 0.34$ | n.d.            | $3.87 \pm 0.50$  |
|       | 3     | $56.64 \pm 0.10$ | $34.93 \pm 0.99$ | $1.06 \pm 0.39$ | $3.05 \pm 0.49$ | $1.23 \pm 0.31$ | $13.01 \pm 1.05$ |
|       | 6     | $3.30 \pm 0.51$  | $32.43 \pm 0.36$ | $1.18 \pm 0.30$ | $5.25 \pm 0.50$ | $1.45 \pm 0.29$ | $37.78 \pm 1.63$ |
| M6-13 | 12    | n.d.             | $26.74 \pm 0.05$ | $1.32 \pm 0.40$ | $5.44 \pm 0.43$ | $1.52 \pm 0.29$ | $40.87 \pm 1.31$ |
|       | 24    | n.d.             | $19.85 \pm 1.51$ | $1.59 \pm 0.45$ | $6.29 \pm 0.49$ | $1.64 \pm 0.31$ | $45.79 \pm 1.68$ |
|       | 36    | n.d.             | $11.94 \pm 3.12$ | $1.83 \pm 0.38$ | $6.49 \pm 0.46$ | $1.71 \pm 0.30$ | $49.41 \pm 2.04$ |
|       | 48    | n.d.             | $6.55 \pm 3.26$  | $1.94 \pm 0.34$ | $6.53 \pm 0.42$ | $1.77 \pm 0.30$ | $50.87 \pm 2.42$ |
|       | 60    | n.d.             | $3.70 \pm 2.25$  | $2.00 \pm 0.33$ | $6.49 \pm 0.47$ | $1.82 \pm 0.31$ | $52.49 \pm 2.04$ |
|       | 72    | n.d.             | $2.38 \pm 1.07$  | $2.03 \pm 0.32$ | $6.50 \pm 0.53$ | $1.89 \pm 0.34$ | $53.61 \pm 2.21$ |
|       | Input | $83.54 \pm 1.05$ | $35.44 \pm 0.64$ | n.d.            | n.d.            | n.d.            | n.d.             |
|       | 0     | $82.50 \pm 1.32$ | $35.30 \pm 0.85$ | n.d.            | n.d.            | n.d.            | n.d.             |
|       | 1     | $76.73 \pm 1.00$ | $34.99 \pm 0.53$ | $0.56 \pm 0.55$ | $1.22 \pm 0.39$ | n.d.            | $3.56 \pm 0.63$  |
|       | 3     | $54.6 \pm 1.00$  | $33.97 \pm 0.42$ | $0.63 \pm 0.61$ | $2.72 \pm 0.39$ | $0.97 \pm 0.39$ | $13.07 \pm 0.87$ |
|       | 6     | $2.40 \pm 1.34$  | $31.87 \pm 1.67$ | $0.91 \pm 0.35$ | $4.92 \pm 0.27$ | $1.20 \pm 0.38$ | $37.73 \pm 0.75$ |
| M6-15 | 12    | n.d.             | $24.68 \pm 0.67$ | $1.10 \pm 0.37$ | $5.25 \pm 0.32$ | $1.29 \pm 0.38$ | $40.82 \pm 0.98$ |
|       | 24    | n.d.             | $15.58 \pm 1.11$ | $1.34 \pm 0.42$ | $5.99 \pm 0.51$ | $1.42 \pm 0.38$ | $46.21 \pm 1.87$ |
|       | 36    | n.d.             | $7.36 \pm 1.14$  | $1.57 \pm 0.41$ | $6.21 \pm 0.56$ | $1.51 \pm 0.37$ | $50.22 \pm 2.63$ |
|       | 48    | n.d.             | $3.11 \pm 0.87$  | $1.70 \pm 0.36$ | $6.42 \pm 0.21$ | $1.57 \pm 0.37$ | $52.78 \pm 1.73$ |
|       | 60    | n.d.             | $1.34 \pm 0.32$  | $1.69 \pm 0.32$ | $6.28 \pm 0.21$ | $1.62 \pm 0.39$ | $52.48 \pm 1.24$ |
|       | 72    | n.d.             | $0.84 \pm 0.31$  | $1.71 \pm 0.37$ | $6.27 \pm 0.25$ | $1.69 \pm 0.41$ | $53.09 \pm 1.30$ |
|       | Input | $84.79 \pm 1.63$ | $35.97 \pm 0.79$ | n.d.            | n.d.            | n.d.            | n.d.             |
| M6-16 | 0     | $83.29 \pm 1.44$ | $35.64 \pm 0.71$ | n.d.            | n.d.            | n.d.            | n.d.             |
|       | 1     | $77.62 \pm 1.16$ | $35.29 \pm 0.59$ | $0.53 \pm 0.49$ | $1.18 \pm 0.21$ | n.d.            | $3.33 \pm 0.23$  |

|       |       |                  |                  |                 |                 |                 |                  |
|-------|-------|------------------|------------------|-----------------|-----------------|-----------------|------------------|
|       | 3     | $56.13 \pm 2.16$ | $34.75 \pm 0.75$ | $0.78 \pm 0.27$ | $2.77 \pm 0.06$ | $0.96 \pm 0.30$ | $12.83 \pm 0.22$ |
|       | 6     | $2.03 \pm 1.97$  | $33.18 \pm 0.51$ | $0.92 \pm 0.22$ | $5.17 \pm 0.08$ | $1.19 \pm 0.32$ | $37.71 \pm 0.70$ |
|       | 12    | n.d.             | $26.75 \pm 0.96$ | $1.10 \pm 0.26$ | $5.47 \pm 0.2$  | $1.28 \pm 0.33$ | $40.60 \pm 1.22$ |
|       | 24    | n.d.             | $17.72 \pm 1.66$ | $1.25 \pm 0.19$ | $5.73 \pm 0.21$ | $1.41 \pm 0.30$ | $44.24 \pm 1.54$ |
|       | 36    | n.d.             | $10.01 \pm 2.43$ | $1.41 \pm 0.28$ | $6.00 \pm 0.29$ | $1.51 \pm 0.31$ | $48.30 \pm 2.75$ |
|       | 48    | n.d.             | $5.65 \pm 2.45$  | $1.61 \pm 0.14$ | $6.29 \pm 0.13$ | $1.57 \pm 0.32$ | $50.65 \pm 1.17$ |
|       | 60    | n.d.             | $2.92 \pm 1.37$  | $1.67 \pm 0.30$ | $6.39 \pm 0.18$ | $1.60 \pm 0.30$ | $52.44 \pm 1.78$ |
|       | 72    | n.d.             | $1.51 \pm 0.59$  | $1.72 \pm 0.32$ | $6.34 \pm 0.07$ | $1.66 \pm 0.32$ | $52.98 \pm 1.17$ |
|       | Input | $85.05 \pm 1.19$ | $36.09 \pm 0.58$ | n.d.            | n.d.            | n.d.            | n.d.             |
|       | 0     | $84.67 \pm 2.89$ | $36.25 \pm 1.35$ | n.d.            | n.d.            | n.d.            | n.d.             |
|       | 1     | $78.27 \pm 0.68$ | $35.60 \pm 0.36$ | $0.54 \pm 0.51$ | $1.19 \pm 0.32$ | n.d.            | $3.33 \pm 0.47$  |
|       | 3     | $55.72 \pm 1.16$ | $34.72 \pm 0.69$ | $0.61 \pm 0.58$ | $2.93 \pm 0.36$ | $0.98 \pm 0.33$ | $12.86 \pm 0.76$ |
|       | 6     | $2.09 \pm 0.69$  | $32.81 \pm 0.64$ | $0.92 \pm 0.31$ | $5.33 \pm 0.37$ | $1.18 \pm 0.28$ | $37.65 \pm 1.08$ |
| M6-19 | 12    | $0.28 \pm 0.48$  | $27.76 \pm 0.35$ | $1.03 \pm 0.42$ | $5.59 \pm 0.48$ | $1.26 \pm 0.31$ | $40.27 \pm 1.43$ |
|       | 24    | n.d.             | $20.80 \pm 2.40$ | $1.30 \pm 0.37$ | $5.87 \pm 0.32$ | $1.34 \pm 0.33$ | $43.14 \pm 1.47$ |
|       | 36    | n.d.             | $13.96 \pm 3.59$ | $1.40 \pm 0.35$ | $6.04 \pm 0.30$ | $1.42 \pm 0.32$ | $46.72 \pm 1.56$ |
|       | 48    | n.d.             | $8.89 \pm 3.79$  | $1.62 \pm 0.44$ | $6.04 \pm 0.33$ | $1.46 \pm 0.33$ | $48.68 \pm 2.33$ |
|       | 60    | n.d.             | $5.89 \pm 3.58$  | $1.75 \pm 0.32$ | $6.41 \pm 0.36$ | $1.53 \pm 0.32$ | $51.65 \pm 3.47$ |
|       | 72    | n.d.             | $3.62 \pm 2.55$  | $1.88 \pm 0.33$ | $6.36 \pm 0.57$ | $1.57 \pm 0.33$ | $51.95 \pm 3.7$  |
|       | Input | $85.05 \pm 1.19$ | $36.09 \pm 0.58$ | n.d.            | n.d.            | n.d.            | n.d.             |
|       | 0     | $83.55 \pm 1.70$ | $35.73 \pm 0.83$ | n.d.            | n.d.            | n.d.            | n.d.             |
|       | 1     | $78.38 \pm 1.72$ | $35.52 \pm 0.55$ | $0.54 \pm 0.51$ | $1.17 \pm 0.37$ | n.d.            | $3.18 \pm 0.67$  |
|       | 3     | $57.32 \pm 3.69$ | $34.29 \pm 1.10$ | $0.61 \pm 0.58$ | $2.64 \pm 0.60$ | $0.94 \pm 0.35$ | $11.94 \pm 2.09$ |
|       | 6     | $5.89 \pm 4.20$  | $32.73 \pm 1.47$ | $0.90 \pm 0.37$ | $5.05 \pm 0.52$ | $1.21 \pm 0.29$ | $36.28 \pm 2.19$ |
| M6-20 | 12    | n.d.             | $24.62 \pm 1.30$ | $1.08 \pm 0.40$ | $5.53 \pm 0.68$ | $1.33 \pm 0.33$ | $41.61 \pm 1.31$ |
|       | 24    | n.d.             | $13.99 \pm 3.48$ | $1.32 \pm 0.40$ | $6.18 \pm 0.65$ | $1.50 \pm 0.35$ | $46.93 \pm 1.45$ |
|       | 36    | n.d.             | $7.15 \pm 3.69$  | $1.51 \pm 0.34$ | $6.34 \pm 0.50$ | $1.60 \pm 0.36$ | $50.02 \pm 1.72$ |
|       | 48    | n.d.             | $3.38 \pm 2.08$  | $1.66 \pm 0.32$ | $6.57 \pm 0.52$ | $1.70 \pm 0.34$ | $52.40 \pm 0.56$ |
|       | 60    | n.d.             | $1.59 \pm 0.89$  | $1.68 \pm 0.31$ | $6.55 \pm 0.37$ | $1.76 \pm 0.33$ | $52.85 \pm 1.27$ |
|       | 72    | n.d.             | $0.67 \pm 0.68$  | $1.70 \pm 0.33$ | $6.53 \pm 0.43$ | $1.83 \pm 0.34$ | $53.35 \pm 2.49$ |
| M6-21 | Input | $84.79 \pm 1.63$ | $35.97 \pm 0.79$ | n.d.            | n.d.            | n.d.            | n.d.             |

|       |       |                  |                  |                 |                 |                 |                  |
|-------|-------|------------------|------------------|-----------------|-----------------|-----------------|------------------|
|       | 0     | $83.37 \pm 0.96$ | $35.72 \pm 0.53$ | n.d.            | n.d.            | n.d.            | n.d.             |
|       | 1     | $77.50 \pm 0.43$ | $35.28 \pm 0.44$ | $0.54 \pm 0.50$ | $1.18 \pm 0.29$ | n.d.            | $3.34 \pm 0.44$  |
|       | 3     | $55.71 \pm 0.29$ | $34.54 \pm 0.59$ | $0.62 \pm 0.57$ | $2.77 \pm 0.39$ | $0.95 \pm 0.30$ | $12.96 \pm 0.78$ |
|       | 6     | $2.15 \pm 1.06$  | $32.35 \pm 0.71$ | $0.91 \pm 0.31$ | $5.06 \pm 0.46$ | $1.17 \pm 0.29$ | $37.63 \pm 1.57$ |
|       | 12    | n.d.             | $26.15 \pm 0.51$ | $1.10 \pm 0.33$ | $5.43 \pm 0.51$ | $1.28 \pm 0.28$ | $41.32 \pm 1.32$ |
|       | 24    | n.d.             | $16.95 \pm 2.99$ | $1.34 \pm 0.33$ | $5.88 \pm 0.46$ | $1.44 \pm 0.27$ | $45.52 \pm 2.08$ |
|       | 36    | n.d.             | $9.17 \pm 3.87$  | $1.52 \pm 0.35$ | $6.05 \pm 0.60$ | $1.52 \pm 0.25$ | $48.61 \pm 3.23$ |
|       | 48    | n.d.             | $5.12 \pm 3.48$  | $1.68 \pm 0.26$ | $6.39 \pm 0.34$ | $1.57 \pm 0.25$ | $51.22 \pm 2.92$ |
|       | 60    | n.d.             | $2.67 \pm 1.91$  | $1.72 \pm 0.24$ | $6.37 \pm 0.33$ | $1.63 \pm 0.26$ | $52.73 \pm 1.97$ |
|       | 72    | n.d.             | $1.46 \pm 0.95$  | $1.73 \pm 0.21$ | $6.40 \pm 0.26$ | $1.68 \pm 0.26$ | $53.11 \pm 1.22$ |
|       | Input | $84.94 \pm 1.37$ | $35.94 \pm 0.84$ | n.d.            | n.d.            | n.d.            | n.d.             |
|       | 0     | $83.02 \pm 1.61$ | $35.38 \pm 0.89$ | n.d.            | n.d.            | n.d.            | n.d.             |
|       | 1     | $77.09 \pm 2.69$ | $34.84 \pm 1.28$ | $0.54 \pm 0.50$ | $1.13 \pm 0.32$ | n.d.            | $3.18 \pm 0.38$  |
|       | 3     | $57.02 \pm 3.88$ | $34.04 \pm 1.21$ | $0.60 \pm 0.57$ | $2.65 \pm 0.44$ | $0.93 \pm 0.34$ | $11.67 \pm 1.33$ |
|       | 6     | $6.94 \pm 5.74$  | $32.66 \pm 1.54$ | $0.90 \pm 0.33$ | $5.02 \pm 0.48$ | $1.17 \pm 0.30$ | $35.03 \pm 2.70$ |
| M6-22 | 12    | n.d.             | $26.64 \pm 2.13$ | $1.09 \pm 0.38$ | $5.44 \pm 0.47$ | $1.24 \pm 0.32$ | $40.54 \pm 1.53$ |
|       | 24    | n.d.             | $18.74 \pm 3.31$ | $1.28 \pm 0.47$ | $5.90 \pm 0.41$ | $1.38 \pm 0.31$ | $44.64 \pm 1.38$ |
|       | 36    | n.d.             | $11.99 \pm 4.79$ | $1.47 \pm 0.28$ | $6.12 \pm 0.43$ | $1.45 \pm 0.31$ | $48.08 \pm 2.73$ |
|       | 48    | n.d.             | $7.84 \pm 5.08$  | $1.67 \pm 0.37$ | $6.25 \pm 0.36$ | $1.48 \pm 0.34$ | $49.79 \pm 1.53$ |
|       | 60    | n.d.             | $4.48 \pm 3.51$  | $1.84 \pm 0.22$ | $6.23 \pm 0.31$ | $1.54 \pm 0.33$ | $51.42 \pm 0.72$ |
|       | 72    | n.d.             | $2.59 \pm 2.00$  | $1.98 \pm 0.33$ | $6.23 \pm 0.31$ | $1.61 \pm 0.33$ | $52.24 \pm 0.13$ |
