# Supplementary material for: Molecular evolutionary engineering of xylose isomerase to improve its catalytic activity and performance of micro-aerobic glucose/xylose co-fermentation in Saccharomyces cerevisiae
Source: PubMed Central journal article supplement (PMC6551904; doi:10.1186/s13068-019-1474-z), 2019-06-06
Supplement: 13068_2019_1474_MOESM7_ESM.pdf [file 13068_2019_1474_MOESM7_ESM.pdf]

| Strain | Time (h) | Glucose      | Xylose       | Xylitol     | Glycerol    | Acetate     | Ethanol      |
|--------|----------|--------------|--------------|-------------|-------------|-------------|--------------|
| SS81   | Input    | 83.85 ± 3.25 | 35.62 ± 1.02 | n.d.        | n.d.        | n.d.        | n.d.         |
|        | 0        | 83.19 ± 2.94 | 35.61 ± 0.74 | n.d.        | n.d.        | n.d.        | n.d.         |
|        | 1        | 77.00 ± 2.90 | 35.21 ± 0.50 | 0.60 ± 0.53 | 1.48 ± 0.10 | n.d.        | 4.12 ± 0.50  |
|        | 3        | 54.51 ± 3.24 | 34.50 ± 0.46 | 1.02 ± 0.1  | 3.00 ± 0.21 | 0.43 ± 0.75 | 13.92 ± 1.47 |
|        | 6        | 2.79 ± 0.79  | 31.73 ± 1.21 | 1.15 ± 0.11 | 5.08 ± 0.18 | 1.35 ± 0.11 | 37.37 ± 1.63 |
|        | 12       | 0.30 ± 0.51  | 28.93 ± 1.01 | 1.30 ± 0.09 | 5.35 ± 0.14 | 1.37 ± 0.11 | 40.09 ± 1.33 |
|        | 24       | n.d.         | 24.07 ± 1.97 | 1.47 ± 0.08 | 5.36 ± 0.12 | 1.41 ± 0.09 | 41.13 ± 1.54 |
|        | 36       | n.d.         | 20.56 ± 2.37 | 1.69 ± 0.15 | 5.54 ± 0.22 | 1.42 ± 0.12 | 43.35 ± 1.82 |
|        | 48       | n.d.         | 16.94 ± 2.66 | 1.91 ± 0.16 | 5.68 ± 0.22 | 1.47 ± 0.13 | 45.05 ± 1.79 |
|        | 60       | n.d.         | 12.91 ± 2.75 | 2.07 ± 0.19 | 5.64 ± 0.36 | 1.49 ± 0.11 | 46.98 ± 1.94 |
|        | 72       | n.d.         | 9.52 ± 3.47  | 2.22 ± 0.20 | 5.77 ± 0.16 | 1.52 ± 0.11 | 49.20 ± 2.37 |
| SS82   | Input    | 83.85 ± 3.25 | 35.62 ± 1.02 | n.d.        | n.d.        | n.d.        | n.d.         |
|        | 0        | 83.34 ± 3.30 | 35.65 ± 0.78 | n.d.        | n.d.        | n.d.        | n.d.         |
|        | 1        | 76.34 ± 1.86 | 34.93 ± 0.03 | 0.89 ± 0.09 | 1.50 ± 0.09 | n.d.        | 4.14 ± 0.53  |
|        | 3        | 53.94 ± 3.45 | 34.34 ± 0.58 | 1.05 ± 0.08 | 3.10 ± 0.14 | 0.43 ± 0.75 | 14.09 ± 1.16 |
|        | 6        | 2.81 ± 0.85  | 30.71 ± 0.99 | 1.20 ± 0.09 | 5.30 ± 0.10 | 1.34 ± 0.10 | 37.97 ± 1.21 |
|        | 12       | 0.58 ± 0.51  | 24.28 ± 0.67 | 1.35 ± 0.11 | 5.49 ± 0.12 | 1.37 ± 0.10 | 41.46 ± 1.70 |
|        | 24       | n.d.         | 17.19 ± 2.02 | 1.58 ± 0.09 | 5.71 ± 0.07 | 1.41 ± 0.12 | 44.48 ± 0.95 |
|        | 36       | n.d.         | 11.15 ± 2.33 | 1.85 ± 0.12 | 6.00 ± 0.22 | 1.46 ± 0.11 | 47.68 ± 1.20 |
|        | 48       | n.d.         | 6.25 ± 1.63  | 1.91 ± 0.23 | 6.07 ± 0.33 | 1.48 ± 0.14 | 49.80 ± 1.38 |
|        | 60       | n.d.         | 3.14 ± 0.58  | 2.07 ± 0.17 | 6.18 ± 0.33 | 1.52 ± 0.11 | 51.67 ± 1.91 |
|        | 72       | n.d.         | 1.59 ± 0.52  | 2.12 ± 0.21 | 6.14 ± 0.21 | 1.56 ± 0.12 | 52.32 ± 0.57 |
| SS89   | Input    | 83.56 ± 2.13 | 35.77 ± 1.21 | n.d.        | n.d.        | n.d.        | n.d.         |
|        | 0        | 81.94 ± 0.92 | 35.36 ± 0.27 | n.d.        | n.d.        | n.d.        | n.d.         |
|        | 1        | 74.88 ± 0.67 | 35.07 ± 0.11 | 0.87 ± 0.07 | 1.50 ± 0.06 | n.d.        | 4.29 ± 0.41  |
|        | 3        | 52.52 ± 1.14 | 34.52 ± 0.29 | 0.99 ± 0.11 | 3.14 ± 0.15 | n.d.        | 14.16 ± 0.33 |
|        | 6        | 1.96 ± 0.19  | 30.59 ± 1.03 | 1.16 ± 0.11 | 5.15 ± 0.29 | 1.18 ± 0.04 | 37.47 ± 0.45 |
|        | 12       | 0.34 ± 0.58  | 27.81 ± 1.04 | 1.29 ± 0.09 | 5.46 ± 0.20 | 1.21 ± 0.05 | 39.71 ± 0.63 |

|      |       |                  |                  |                 |                 |                 |                  |
|------|-------|------------------|------------------|-----------------|-----------------|-----------------|------------------|
|      | 24    | n.d.             | $23.20 \pm 1.92$ | $1.52 \pm 0.11$ | $5.62 \pm 0.34$ | $1.26 \pm 0.07$ | $42.41 \pm 0.14$ |
|      | 36    | n.d.             | $17.97 \pm 2.04$ | $1.74 \pm 0.10$ | $5.66 \pm 0.22$ | $1.29 \pm 0.06$ | $44.47 \pm 1.35$ |
|      | 48    | n.d.             | $12.94 \pm 1.92$ | $1.93 \pm 0.15$ | $5.66 \pm 0.31$ | $1.30 \pm 0.05$ | $46.33 \pm 0.64$ |
|      | 60    | n.d.             | $9.39 \pm 2.11$  | $2.04 \pm 0.21$ | $5.73 \pm 0.28$ | $1.33 \pm 0.06$ | $47.91 \pm 0.75$ |
|      | 72    | n.d.             | $6.01 \pm 1.78$  | $2.21 \pm 0.19$ | $5.93 \pm 0.19$ | $1.33 \pm 0.04$ | $50.20 \pm 0.44$ |
|      | Input | $83.68 \pm 3.39$ | $35.38 \pm 1.14$ | n.d.            | n.d.            | n.d.            | n.d.             |
|      | 0     | $82.68 \pm 1.53$ | $35.29 \pm 0.27$ | n.d.            | n.d.            | n.d.            | n.d.             |
|      | 1     | $75.10 \pm 2.19$ | $34.64 \pm 0.13$ | $0.88 \pm 0.11$ | $1.56 \pm 0.05$ | n.d.            | $4.48 \pm 0.15$  |
|      | 3     | $52.26 \pm 2.49$ | $33.37 \pm 0.69$ | $0.97 \pm 0.16$ | $3.14 \pm 0.20$ | $0.43 \pm 0.75$ | $14.37 \pm 0.32$ |
|      | 6     | $3.02 \pm 0.75$  | $30.69 \pm 0.58$ | $1.17 \pm 0.17$ | $5.47 \pm 0.04$ | $1.31 \pm 0.13$ | $38.12 \pm 0.88$ |
| SS92 | 12    | $0.77 \pm 0.05$  | $23.51 \pm 1.01$ | $1.37 \pm 0.18$ | $5.68 \pm 0.22$ | $1.34 \pm 0.12$ | $42.37 \pm 0.27$ |
|      | 24    | n.d.             | $15.02 \pm 1.37$ | $1.60 \pm 0.15$ | $5.83 \pm 0.13$ | $1.38 \pm 0.11$ | $45.57 \pm 1.03$ |
|      | 36    | n.d.             | $8.04 \pm 0.31$  | $1.78 \pm 0.24$ | $6.11 \pm 0.43$ | $1.41 \pm 0.13$ | $48.82 \pm 1.36$ |
|      | 48    | n.d.             | $3.76 \pm 0.37$  | $1.91 \pm 0.23$ | $6.25 \pm 0.39$ | $1.44 \pm 0.14$ | $50.12 \pm 1.52$ |
|      | 60    | n.d.             | $1.67 \pm 0.04$  | $1.90 \pm 0.24$ | $5.98 \pm 0.44$ | $1.48 \pm 0.14$ | $50.94 \pm 1.56$ |
|      | 72    | n.d.             | $1.00 \pm 0.08$  | $1.99 \pm 0.09$ | $6.23 \pm 0.30$ | $1.53 \pm 0.14$ | $52.69 \pm 0.40$ |
|      | Input | $82.68 \pm 1.65$ | $35.2 \pm 0.84$  | n.d.            | n.d.            | n.d.            | n.d.             |
|      | 0     | $81.97 \pm 1.06$ | $35.3 \pm 0.69$  | n.d.            | n.d.            | n.d.            | n.d.             |
|      | 1     | $75.63 \pm 3.19$ | $35.31 \pm 0.97$ | $0.87 \pm 0.10$ | $1.54 \pm 0.02$ | n.d.            | $4.34 \pm 0.30$  |
|      | 3     | $51.34 \pm 3.08$ | $33.93 \pm 1.30$ | $1.00 \pm 0.10$ | $3.19 \pm 0.08$ | n.d.            | $14.47 \pm 0.64$ |
|      | 6     | $1.37 \pm 0.24$  | $32.30 \pm 0.21$ | $1.21 \pm 0.15$ | $5.58 \pm 0.15$ | $1.30 \pm 0.11$ | $38.60 \pm 0.66$ |
| SS93 | 12    | $0.82 \pm 0.09$  | $27.67 \pm 0.41$ | $1.30 \pm 0.13$ | $5.52 \pm 0.10$ | $1.32 \pm 0.12$ | $39.81 \pm 0.41$ |
|      | 24    | n.d.             | $22.85 \pm 0.61$ | $1.52 \pm 0.13$ | $5.67 \pm 0.23$ | $1.37 \pm 0.12$ | $42.25 \pm 0.66$ |
|      | 36    | n.d.             | $17.89 \pm 1.05$ | $1.72 \pm 0.13$ | $5.68 \pm 0.16$ | $1.38 \pm 0.11$ | $43.88 \pm 0.75$ |
|      | 48    | n.d.             | $13.52 \pm 1.08$ | $1.91 \pm 0.15$ | $5.75 \pm 0.23$ | $1.42 \pm 0.14$ | $45.78 \pm 0.84$ |
|      | 60    | n.d.             | $8.94 \pm 1.46$  | $2.02 \pm 0.24$ | $5.72 \pm 0.39$ | $1.45 \pm 0.14$ | $47.42 \pm 0.37$ |
|      | 72    | n.d.             | $5.85 \pm 1.10$  | $2.20 \pm 0.24$ | $5.92 \pm 0.35$ | $1.46 \pm 0.16$ | $49.24 \pm 0.48$ |
