# Supplementary material for: Molecular evolutionary engineering of xylose isomerase to improve its catalytic activity and performance of micro-aerobic glucose/xylose co-fermentation in Saccharomyces cerevisiae
Source: PubMed Central journal article supplement (PMC6551904; doi:10.1186/s13068-019-1474-z), 2019-06-06
Supplement: 13068_2019_1474_MOESM8_ESM.pdf [file 13068_2019_1474_MOESM8_ESM.pdf]

**SS84 (*LpXI-K136T/A176T*)**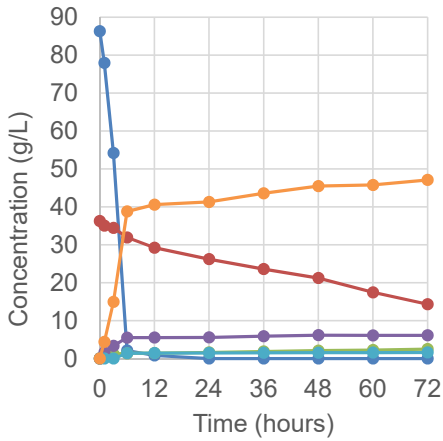

Glucose Xylose Xylitol  
Glycerol Acetate Ethanol

**SS85 (*LpXI-Y13H/D228V*)**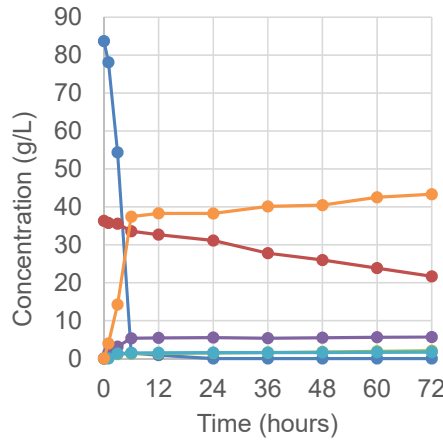

Glucose Xylose Xylitol  
Glycerol Acetate Ethanol

**SS86 (*LpXI-T273A*)**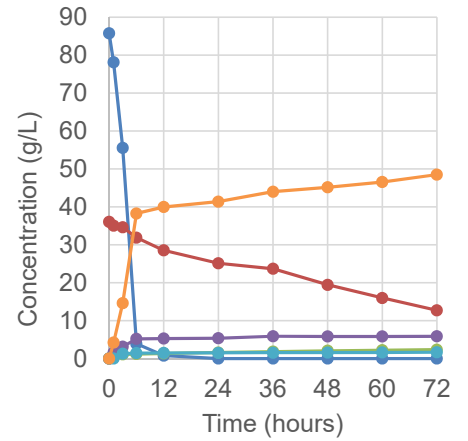

Glucose Xylose Xylitol  
Glycerol Acetate Ethanol

**SS87 (*LpXI-D207G*)**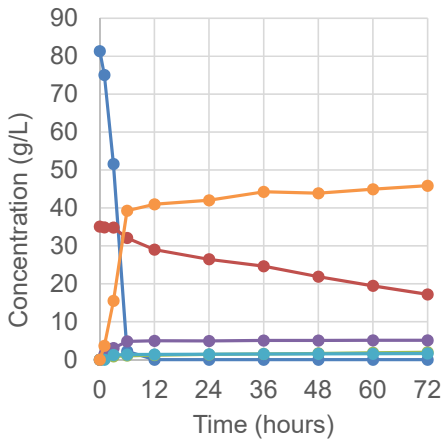

Glucose Xylose Xylitol  
Glycerol Acetate Ethanol

**SS88 (*LpXI-N223I*)**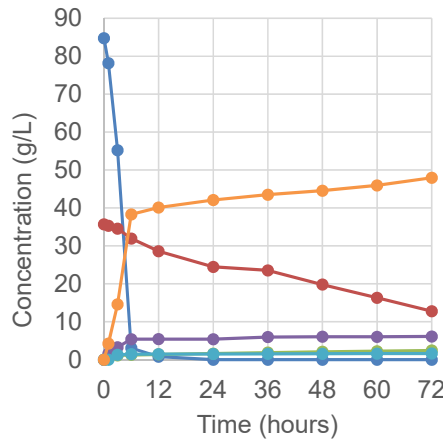

Glucose Xylose Xylitol  
Glycerol Acetate Ethanol

**SS91 (*LpXI-E114G*)**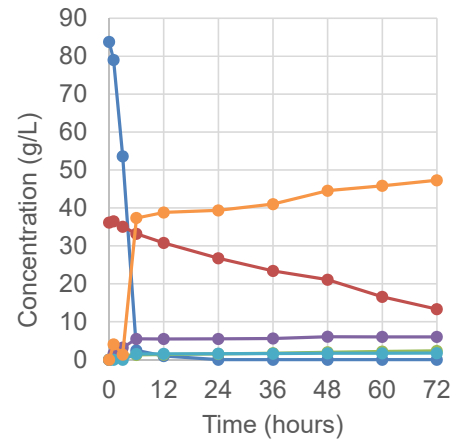

Glucose Xylose Xylitol  
Glycerol Acetate Ethanol

**SS94 (*LpXI-L304S*)**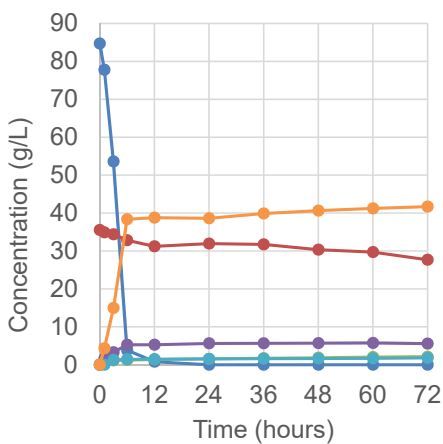

Glucose Xylose Xylitol  
Glycerol Acetate Ethanol
