# Supplementary material for: Molecular evolutionary engineering of xylose isomerase to improve its catalytic activity and performance of micro-aerobic glucose/xylose co-fermentation in Saccharomyces cerevisiae
Source: PubMed Central journal article supplement (PMC6551904; doi:10.1186/s13068-019-1474-z), 2019-06-06
Supplement: 13068_2019_1474_MOESM9_ESM.pdf [file 13068_2019_1474_MOESM9_ESM.pdf]

| Strain | Time (h) | Glucose | Xylose | Xylitol | Glycerol | Acetate | Ethanol |
|--------|----------|---------|--------|---------|----------|---------|---------|
| SS84   | Input    | 87.59   | 36.70  | n.d.    | n.d.     | n.d.    | n.d.    |
|        | 0        | 86.33   | 36.27  | n.d.    | n.d.     | n.d.    | n.d.    |
|        | 1        | 77.96   | 35.03  | 1.02    | 1.63     | n.d.    | 4.40    |
|        | 3        | 54.21   | 34.46  | 1.17    | 3.35     | n.d.    | 14.97   |
|        | 6        | 2.14    | 31.93  | 1.39    | 5.51     | 1.40    | 38.78   |
|        | 12       | 0.81    | 29.24  | 1.45    | 5.54     | 1.45    | 40.59   |
|        | 24       | n.d.    | 26.23  | 1.62    | 5.58     | 1.48    | 41.29   |
|        | 36       | n.d.    | 23.59  | 1.87    | 5.90     | 1.52    | 43.58   |
|        | 48       | n.d.    | 21.23  | 2.10    | 6.17     | 1.56    | 45.47   |
|        | 60       | n.d.    | 17.47  | 2.26    | 6.11     | 1.58    | 45.77   |
|        | 72       | n.d.    | 14.32  | 2.49    | 6.14     | 1.61    | 47.10   |
| SS85   | Input    | 84.59   | 36.18  | n.d.    | n.d.     | n.d.    | n.d.    |
|        | 0        | 83.71   | 36.32  | n.d.    | n.d.     | n.d.    | n.d.    |
|        | 1        | 78.13   | 35.75  | 0.96    | 1.53     | n.d.    | 4.00    |
|        | 3        | 54.36   | 35.56  | 1.15    | 3.14     | 1.32    | 14.23   |
|        | 6        | 1.49    | 33.57  | 1.30    | 5.35     | 1.47    | 37.41   |
|        | 12       | 0.89    | 32.67  | 1.35    | 5.46     | 1.52    | 38.28   |
|        | 24       | n.d.    | 31.13  | 1.48    | 5.54     | 1.58    | 38.26   |
|        | 36       | n.d.    | 27.78  | 1.60    | 5.38     | 1.57    | 40.12   |
|        | 48       | n.d.    | 25.98  | 1.75    | 5.50     | 1.60    | 40.46   |
|        | 60       | n.d.    | 23.85  | 1.92    | 5.61     | 1.65    | 42.53   |
|        | 72       | n.d.    | 21.68  | 2.06    | 5.68     | 1.69    | 43.32   |
| SS86   | Input    | 87.59   | 36.70  | n.d.    | n.d.     | n.d.    | n.d.    |
|        | 0        | 85.76   | 36.07  | n.d.    | n.d.     | n.d.    | n.d.    |
|        | 1        | 78.13   | 35.02  | 0.98    | 1.56     | n.d.    | 4.24    |
|        | 3        | 55.55   | 34.63  | 1.11    | 3.14     | 1.29    | 14.60   |
|        | 6        | 3.92    | 31.88  | 1.24    | 5.21     | 1.44    | 38.26   |
|        | 12       | 0.79    | 28.55  | 1.38    | 5.30     | 1.49    | 39.96   |

|      |       |       |       |      |      |      |       |
|------|-------|-------|-------|------|------|------|-------|
|      | 24    | n.d.  | 25.11 | 1.56 | 5.38 | 1.51 | 41.38 |
|      | 36    | n.d.  | 23.69 | 1.84 | 5.89 | 1.56 | 44.01 |
|      | 48    | n.d.  | 19.45 | 2.08 | 5.84 | 1.59 | 45.16 |
|      | 60    | n.d.  | 15.98 | 2.19 | 5.83 | 1.62 | 46.55 |
|      | 72    | n.d.  | 12.74 | 2.35 | 5.88 | 1.67 | 48.51 |
|      | Input | 81.71 | 34.99 | n.d. | n.d. | n.d. | n.d.  |
|      | 0     | 81.33 | 35.10 | n.d. | n.d. | n.d. | n.d.  |
|      | 1     | 75.06 | 34.87 | 0.81 | 1.44 | n.d. | 3.65  |
|      | 3     | 51.59 | 34.83 | 0.88 | 3.06 | 1.24 | 15.51 |
|      | 6     | 2.24  | 32.09 | 1.07 | 4.83 | 1.35 | 39.29 |
| SS87 | 12    | n.d.  | 29.03 | 1.19 | 4.97 | 1.38 | 40.97 |
|      | 24    | n.d.  | 26.48 | 1.35 | 4.93 | 1.44 | 42.03 |
|      | 36    | n.d.  | 24.63 | 1.52 | 5.06 | 1.50 | 44.26 |
|      | 48    | n.d.  | 21.90 | 1.67 | 5.06 | 1.53 | 43.88 |
|      | 60    | n.d.  | 19.47 | 1.83 | 5.10 | 1.57 | 44.92 |
|      | 72    | n.d.  | 17.22 | 1.96 | 5.09 | 1.61 | 45.87 |
|      | Input | 87.59 | 36.70 | n.d. | n.d. | n.d. | n.d.  |
|      | 0     | 84.77 | 35.70 | n.d. | n.d. | n.d. | n.d.  |
|      | 1     | 78.18 | 35.32 | 1.06 | 1.58 | n.d. | 4.25  |
|      | 3     | 55.24 | 34.55 | 1.15 | 3.28 | 1.29 | 14.59 |
|      | 6     | 3.06  | 31.94 | 1.29 | 5.39 | 1.45 | 38.29 |
| SS88 | 12    | 0.80  | 28.60 | 1.41 | 5.42 | 1.47 | 40.11 |
|      | 24    | n.d.  | 24.46 | 1.58 | 5.40 | 1.50 | 42.10 |
|      | 36    | n.d.  | 23.55 | 1.88 | 5.98 | 1.54 | 43.51 |
|      | 48    | n.d.  | 19.81 | 2.09 | 6.05 | 1.56 | 44.57 |
|      | 60    | n.d.  | 16.33 | 2.24 | 6.03 | 1.59 | 45.95 |
|      | 72    | n.d.  | 12.79 | 2.42 | 6.12 | 1.62 | 47.96 |
|      | Input | 83.41 | 35.74 | n.d. | n.d. | n.d. | n.d.  |
|      | 0     | 83.78 | 36.16 | n.d. | n.d. | n.d. | n.d.  |
| SS91 | 1     | 79.02 | 36.50 | 1.01 | 1.60 | n.d. | 4.05  |
|      | 3     | 53.62 | 35.06 | 1.12 | 3.18 | n.d. | 1.35  |

|      |       |       |       |      |      |      |       |
|------|-------|-------|-------|------|------|------|-------|
|      | 6     | 2.44  | 33.21 | 1.27 | 5.47 | 1.49 | 37.36 |
|      | 12    | 0.97  | 30.81 | 1.34 | 5.47 | 1.53 | 38.81 |
|      | 24    | n.d.  | 26.75 | 1.50 | 5.49 | 1.59 | 39.37 |
|      | 36    | n.d.  | 23.41 | 1.70 | 5.59 | 1.59 | 41.00 |
|      | 48    | n.d.  | 21.10 | 1.96 | 6.05 | 1.69 | 44.54 |
|      | 60    | n.d.  | 16.59 | 2.15 | 6.00 | 1.68 | 45.84 |
|      | 72    | n.d.  | 13.34 | 2.32 | 6.02 | 1.73 | 47.30 |
|      | Input | 87.59 | 36.70 | n.d. | n.d. | n.d. | n.d.  |
|      | 0     | 84.67 | 35.53 | n.d. | n.d. | n.d. | n.d.  |
|      | 1     | 77.78 | 34.90 | 1.01 | 1.61 | n.d. | 4.33  |
|      | 3     | 53.60 | 34.39 | 1.15 | 3.30 | 1.28 | 15.00 |
|      | 6     | 3.85  | 32.83 | 1.29 | 5.29 | 1.43 | 38.35 |
| SS94 | 12    | 0.81  | 31.24 | 1.38 | 5.29 | 1.47 | 38.77 |
|      | 24    | n.d.  | 31.96 | 1.58 | 5.64 | 1.54 | 38.63 |
|      | 36    | n.d.  | 31.73 | 1.72 | 5.66 | 1.59 | 39.89 |
|      | 48    | n.d.  | 30.32 | 1.87 | 5.69 | 1.65 | 40.65 |
|      | 60    | n.d.  | 29.70 | 2.01 | 5.75 | 1.71 | 41.23 |
|      | 72    | n.d.  | 27.69 | 2.12 | 5.57 | 1.81 | 41.69 |
