# Supplementary material for: Molecular evolutionary engineering of xylose isomerase to improve its catalytic activity and performance of micro-aerobic glucose/xylose co-fermentation in Saccharomyces cerevisiae
Source: PubMed Central journal article supplement (PMC6551904; doi:10.1186/s13068-019-1474-z), 2019-06-06
Supplement: 13068_2019_1474_MOESM10_ESM.pdf [file 13068_2019_1474_MOESM10_ESM.pdf]

| Strain | Time (h) | Glucose      | Xylose       | Xylitol     | Glycerol    | Acetate     | Ethanol      |
|--------|----------|--------------|--------------|-------------|-------------|-------------|--------------|
| SS104  | Input    | 85.13 ± 0.47 | 36.6 ± 0.37  | n.d.        | n.d.        | n.d.        | n.d.         |
|        | 0        | 83.88 ± 1.10 | 36.64 ± 0.60 | n.d.        | n.d.        | n.d.        | 0.59 ± 1.01  |
|        | 1        | 77.47 ± 2.01 | 36.74 ± 0.79 | 1.01 ± 0.03 | 1.70 ± 0.07 | n.d.        | 4.88 ± 0.60  |
|        | 3        | 47.37 ± 3.22 | 34.76 ± 0.67 | 1.14 ± 0.06 | 3.74 ± 0.19 | 0.83 ± 0.72 | 17.20 ± 1.95 |
|        | 6        | 1.72 ± 0.47  | 30.87 ± 1.32 | 1.29 ± 0.09 | 5.79 ± 0.30 | 1.35 ± 0.05 | 39.17 ± 1.72 |
|        | 12       | 0.89 ± 0.05  | 26.01 ± 1.33 | 1.48 ± 0.07 | 5.89 ± 0.15 | 1.39 ± 0.05 | 41.09 ± 1.58 |
|        | 24       | n.d.         | 20.68 ± 1.18 | 1.72 ± 0.07 | 6.15 ± 0.26 | 1.44 ± 0.04 | 43.27 ± 1.84 |
|        | 36       | n.d.         | 15.38 ± 1.56 | 1.95 ± 0.06 | 6.28 ± 0.20 | 1.47 ± 0.04 | 45.57 ± 2.04 |
|        | 48       | n.d.         | 10.34 ± 1.70 | 2.17 ± 0.03 | 6.43 ± 0.15 | 1.50 ± 0.04 | 48.26 ± 1.85 |
|        | 60       | n.d.         | 6.08 ± 1.42  | 2.30 ± 0.08 | 6.51 ± 0.17 | 1.53 ± 0.05 | 50.10 ± 1.17 |
|        | 72       | n.d.         | 3.34 ± 0.84  | 2.41 ± 0.06 | 6.57 ± 0.10 | 1.59 ± 0.04 | 52.29 ± 1.24 |
| SS105  | Input    | 81.17 ± 0.00 | 34.67 ± 0.00 | n.d.        | n.d.        | n.d.        | n.d.         |
|        | 0        | 81.04 ± 0.49 | 34.90 ± 0.19 | n.d.        | n.d.        | n.d.        | n.d.         |
|        | 1        | 75.32 ± 0.28 | 34.87 ± 0.20 | 0.84 ± 0.01 | 1.51 ± 0.01 | n.d.        | 3.65 ± 0.11  |
|        | 3        | 49.02 ± 0.95 | 34.28 ± 0.25 | 0.93 ± 0.01 | 3.36 ± 0.07 | n.d.        | 16.36 ± 0.24 |
|        | 6        | 2.27 ± 0.50  | 31.84 ± 0.47 | 1.10 ± 0.03 | 5.17 ± 0.04 | 1.3 ± 0.01  | 39.07 ± 0.53 |
|        | 12       | n.d.         | 29.62 ± 0.88 | 1.24 ± 0.03 | 5.21 ± 0.06 | 1.34 ± 0.01 | 41.10 ± 0.53 |
|        | 24       | n.d.         | 26.29 ± 1.72 | 1.45 ± 0.07 | 5.38 ± 0.14 | 1.4 ± 0.02  | 41.82 ± 0.71 |
|        | 36       | n.d.         | 23.33 ± 2.23 | 1.61 ± 0.06 | 5.34 ± 0.15 | 1.44 ± 0.03 | 43.40 ± 0.85 |
|        | 48       | n.d.         | 21.20 ± 1.30 | 1.75 ± 0.12 | 5.4 ± 0.10  | 1.49 ± 0.00 | 44.27 ± 1.36 |
|        | 60       | n.d.         | 18.33 ± 1.82 | 1.89 ± 0.10 | 5.34 ± 0.03 | 1.51 ± 0.01 | 45.01 ± 0.57 |
|        | 72       | n.d.         | 16.50 ± 1.71 | 2.03 ± 0.11 | 5.43 ± 0.09 | 1.57 ± 0.02 | 46.10 ± 0.61 |
| SS120  | Input    | 85.40 ± 0.00 | 36.81 ± 0.00 | n.d.        | n.d.        | n.d.        | n.d.         |
|        | 0        | 84.38 ± 1.91 | 36.93 ± 0.73 | n.d.        | n.d.        | n.d.        | 1.19 ± 1.03  |
|        | 1        | 77.02 ± 1.86 | 36.88 ± 0.65 | 0.97 ± 0.01 | 1.69 ± 0.05 | n.d.        | 5.14 ± 0.16  |
|        | 3        | 46.96 ± 2.83 | 35.08 ± 0.61 | 1.08 ± 0.06 | 3.63 ± 0.12 | 1.25 ± 0.01 | 18.27 ± 0.58 |
|        | 6        | 1.52 ± 0.43  | 30.04 ± 1.16 | 1.29 ± 0.02 | 5.65 ± 0.06 | 1.34 ± 0.01 | 40.75 ± 0.53 |
|        | 12       | 0.91 ± 0.04  | 23.73 ± 1.12 | 1.43 ± 0.03 | 5.82 ± 0.16 | 1.38 ± 0.01 | 43.04 ± 0.69 |

|    |      |                  |                 |                 |                 |                  |
|----|------|------------------|-----------------|-----------------|-----------------|------------------|
| 24 | n.d. | $16.08 \pm 1.69$ | $1.72 \pm 0.03$ | $6.19 \pm 0.16$ | $1.43 \pm 0.02$ | $45.82 \pm 1.21$ |
| 36 | n.d. | $9.69 \pm 1.94$  | $1.93 \pm 0.02$ | $6.30 \pm 0.16$ | $1.45 \pm 0.02$ | $48.64 \pm 0.60$ |
| 48 | n.d. | $5.00 \pm 1.55$  | $2.06 \pm 0.01$ | $6.40 \pm 0.13$ | $1.49 \pm 0.01$ | $51.02 \pm 0.65$ |
| 60 | n.d. | $2.33 \pm 0.79$  | $2.06 \pm 0.11$ | $6.43 \pm 0.10$ | $1.54 \pm 0.01$ | $52.29 \pm 0.69$ |
| 72 | n.d. | $1.34 \pm 0.30$  | $2.17 \pm 0.04$ | $6.51 \pm 0.18$ | $1.61 \pm 0.02$ | $53.27 \pm 0.92$ |

---
