# Supplementary material for: Molecular evolutionary engineering of xylose isomerase to improve its catalytic activity and performance of micro-aerobic glucose/xylose co-fermentation in Saccharomyces cerevisiae
Source: PubMed Central journal article supplement (PMC6551904; doi:10.1186/s13068-019-1474-z), 2019-06-06
Supplement: 13068_2019_1474_MOESM12_ESM.pdf [file 13068_2019_1474_MOESM12_ESM.pdf]

| Oligonucleotide        | Sequence (5' > 3')                                      |
|------------------------|---------------------------------------------------------|
| Kan exu F NdeI         | GCGCGC <i><u>CATATG</u></i> TAGGTCTAGAGATCTGTTTAGCTTGCC |
| Kan exu R KpnI         | GCGC <i><u>GGTACC</u></i> ATTAAGGGTTCTCGAGAGCTCGT       |
| PspXIopt_F1            | ATGGCTAAGGAATACTTCCCAC                                  |
| PspXIopt_R1 XhoI       | GCGC <i><u>CTCGAG</u></i> TTGGTACATAGCGACGATAGCTT       |
| OspXIopt_F1            | ATGACTAAGGAATACTTCCCAACTAT                              |
| OspXIopt_R1 XhoI       | GCGC <i><u>CTCGAG</u></i> TTGGTACATAGCGACGATAGCTT       |
| LpXIopt_F1             | ATGAAGAATACTTCCCAAACGTCC                                |
| LpXIopt_R1 XhoI        | GCGC <i><u>CTCGAG</u></i> TCTGAACAAGATGTTGTTGACGA       |
| RfXIopt_F1             | ATGGAATTCTTCTCTAACATCGG                                 |
| RfXIopt_R1 XhoI        | GCGC <i><u>CTCGAG</u></i> CAAAGAGAACAAGACGTTGTTGAC      |
| PrXIopt_F1             | ATGGCTAAGGAATACTTCCCA                                   |
| PrXIopt_R1 XhoI        | G <i><u>CCTCGAG</u></i> CTTACAGTACAAAGCGACAGTAGTTTC     |
| BcXIopt_F1             | ATGTCTTACTTCGAACACATCCC                                 |
| BcXIopt_R1 XhoI        | GCGC <i><u>CTCGAG</u></i> ACGCAAACCGTAGATAGCTTG         |
| RcXIopt_F1             | ATGTCTGAAGTCTTCTCTGGTATCTC                              |
| RcXIopt_R1 XhoI        | GCGC <i><u>CTCGAG</u></i> CTTAGTTTCCAAGATGTATTGGTTC     |
| SrXIopt_F1             | ATGAACTACCAACCAACTCCAGA                                 |
| SrXIopt_R1 XhoI        | GCGC <i><u>CTCGAG</u></i> ACCTCTAGCACCCAACAAGTG         |
| TCYC1-PPGK1 F          | TTTGC GGCCGGTACCACTAGTACTGTAATTGCTTT                    |
| pUG35-TCYC1R           | TCGAGAACCCTTAATGGTACCGGCCGCAAATTA                       |
| oSS62 XI-F_HSP12s      | ACTCAAAAACAAAAAACTAAATACAACACCCAT                       |
| oSS74 XI-Rc            | TTGGGAATTGGTCAGTGTCCCAAC                                |
| oSS63 XI-R_HSP12as     | AGTTTTTTTTGTTTTGAGTTGTTTGTGAGATT                        |
| oSS83 06_LpXI-Fc       | CTGACCAATTCCCAACTGACGTC                                 |
| LpXIopt_Seq_F1         | TTGGCTTTCTTGAGAAAG                                      |
| LpXIopt_Seq_R1         | TAGCGTGGTTAGCTTCGA                                      |
| oSS106 06_LpXI_V162A   | TGTAACGCTGACGCTTTCGCTTACGCT                             |
| oSS107 06_LpXI_V162Aas | AGAAGTAGAAGCACCGTGATGAATCTTGG                           |
| oSS108 06_LpXI_N303T   | CAAGGTGACCCAACCTTTGGGTTGGGAC                            |
| oSS109 06_LpXI_N303Tas | GTTAGCGTCGACAGAACCGAAAGCACC                             |

Restriction endonuclease sites are shown italicized and underlined.
